# Supplementary material for: Cyanopeptolins and Anabaenopeptins Are the Dominant Cyanopeptides from Planktothrix Strains Collected in Canadian Lakes
Source: MDPI journal article supplement (doi:10.3390/toxins16020110), 2024-02-17
Supplement: s1 [file s1]

# Supplementary Materials: Cyanopeptolins and Anabaenopeptins are the Dominant Cyanopeptides from *Planktothrix* Strains Collected in Canadian Lakes

Catrina D. Earnshaw and David R. McMullin

**Table S1.** Cyanobacteria strain information for studied strains from the Canadian Phycological Culture Collection (CPCC).

| Strain                           | Collection Date | Location                 |
|----------------------------------|-----------------|--------------------------|
| <i>P. rubescens</i> CPCC 507     | 27/28-Jan-1999  | Lake Wilcox, ON, Canada  |
| <i>P. agardhii</i> CPCC 720      | 30-Sep-2007     | Brome Lake, QC, Canada   |
| <i>P. rubescens</i> CPCC 731     | 17-Oct-2008     | Vert Lake, QC, Canada    |
| <i>P. rubescens</i> CPCC 732     | 17-Oct-2008     | Vert Lake, QC, Canada    |
| <i>P. rubescens</i> CPCC 733     | 20-Oct-2008     | Vert Lake, QC, Canada    |
| <i>Planktothrix</i> sp. CPCC 735 | 29-July-2010    | Lake Bromont, QC, Canada |

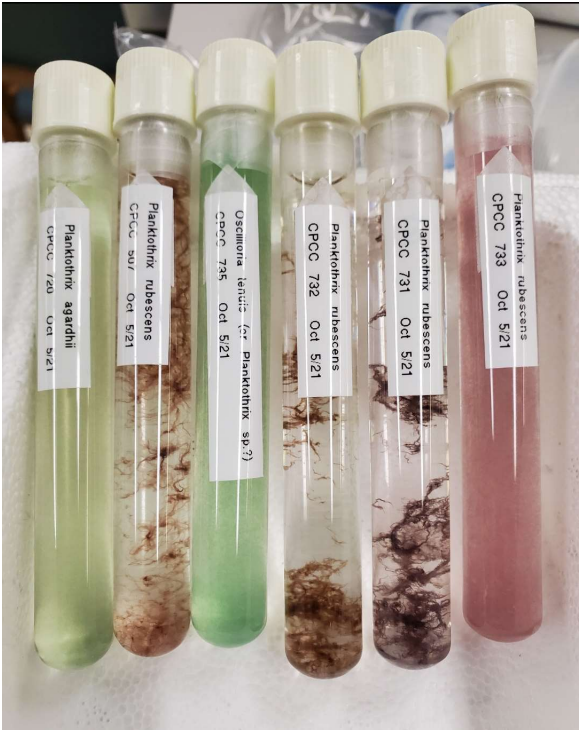

**Figure S1.** The six cyanobacterial strains included in our study (left to right): *P. agardhii* CPCC 720, *P. rubescens* CPCC 507, *Planktothrix* sp. CPCC 735, *P. rubescens* CPCC 732, *P. rubescens* CPCC 731, and *P. rubescens* CPCC 733.

**Table S2.** *Planktothrix* intracellular extract information prior to LC-MS data collection.

| Strain                           | Replicate | Day 14       |              |                      | Day 28       |              |                      |
|----------------------------------|-----------|--------------|--------------|----------------------|--------------|--------------|----------------------|
|                                  |           | Biomass (mg) | Extract (mg) | Volume filtered (mL) | Biomass (mg) | Extract (mg) | Volume filtered (mL) |
| <i>P. rubescens</i> CPCC 507     | 1         | 8.8          | 1.9          | 150                  | 20.8         | 2.3          | 150                  |
| <i>P. rubescens</i> CPCC 507     | 2         | 6.2          | 1.7          | 150                  | 18.4         | 2.7          | 150                  |
| <i>P. rubescens</i> CPCC 507     | 3         | 6.0          | 1.8          | 150                  | 16.6         | 2.6          | 150                  |
| <i>P. rubescens</i> CPCC 507     | 4         | 6.9          | 5.0          | 150                  | 12.7         | 7.8          | 150                  |
| <i>P. agardhii</i> CPCC 720      | 1         | 5.4          | 2.9          | 100                  | 12.2         | 6.0          | 80                   |
| <i>P. agardhii</i> CPCC 720      | 2         | 7.9          | 0.7          | 100                  | 17.8         | 2.1          | 80                   |
| <i>P. agardhii</i> CPCC 720      | 3         | 4.8          | 1.5          | 100                  | 9.5          | 2.8          | 80                   |
| <i>P. agardhii</i> CPCC 720      | 4         | 8.1          | 0.5          | 100                  | 17.7         | 2.5          | 80                   |
| <i>P. rubescens</i> CPCC 731     | 1         | 8.1          | 6.4          | 150                  | 25.7         | 9.2          | 150                  |
| <i>P. rubescens</i> CPCC 731     | 2         | 7.2          | 4.8          | 150                  | 24.1         | 7.0          | 150                  |
| <i>P. rubescens</i> CPCC 731     | 3         | 9.3          | 3.6          | 150                  | 33.5         | 6.0          | 150                  |
| <i>P. rubescens</i> CPCC 731     | 4         | 8.9          | 3.5          | 150                  | 33.0         | 5.8          | 150                  |
| <i>P. rubescens</i> CPCC 732     | 1         | 7.8          | 1.9          | 150                  | 23.1         | 4.6          | 150                  |
| <i>P. rubescens</i> CPCC 732     | 2         | 6.2          | 2.0          | 150                  | 14.8         | 5.1          | 150                  |
| <i>P. rubescens</i> CPCC 732     | 3         | 8.4          | 2.5          | 150                  | 24.3         | 6.6          | 150                  |
| <i>P. rubescens</i> CPCC 732     | 4         | 6.5          | 1.6          | 150                  | 16.9         | 3.8          | 150                  |
| <i>P. rubescens</i> CPCC 733     | 1         | 8.9          | 2.8          | 100                  | 25.9         | 6.0          | 100                  |
| <i>P. rubescens</i> CPCC 733     | 2         | 10.0         | 3.5          | 100                  | 27.1         | 5.5          | 100                  |
| <i>P. rubescens</i> CPCC 733     | 3         | 7.4          | 2.5          | 100                  | 23.8         | 5.0          | 100                  |
| <i>P. rubescens</i> CPCC 733     | 4         | 7.6          | 5.2          | 100                  | 24.3         | 12.0         | 100                  |
| <i>Planktothrix</i> sp. CPCC 735 | 1         | 4.6          | 1.2          | 100                  | 12.0         | 2.9          | 70                   |
| <i>Planktothrix</i> sp. CPCC 735 | 2         | 11.6         | 1.7          | 100                  | 30.0         | 3.8          | 70                   |
| <i>Planktothrix</i> sp. CPCC 735 | 3         | 8.0          | 1.3          | 100                  | 20.3         | 6.8          | 70                   |
| <i>Planktothrix</i> sp. CPCC 735 | 4         | 10.4         | 1.1          | 100                  | 26.4         | 3.7          | 70                   |

**Table S3.** The peak picking parameters used with the bioinformatics R package *xcms*.

| Parameter | Polarity | Scan Pre-filter | $m/z$<br>Deviation (ppm) | s/n Ratio<br>cutoff | Peak Width<br>Range (secs) | Noise Level     |
|-----------|----------|-----------------|--------------------------|---------------------|----------------------------|-----------------|
| Set point | Positive | 5               | 1                        | 5                   | 12–15                      | $1 \times 10^6$ |

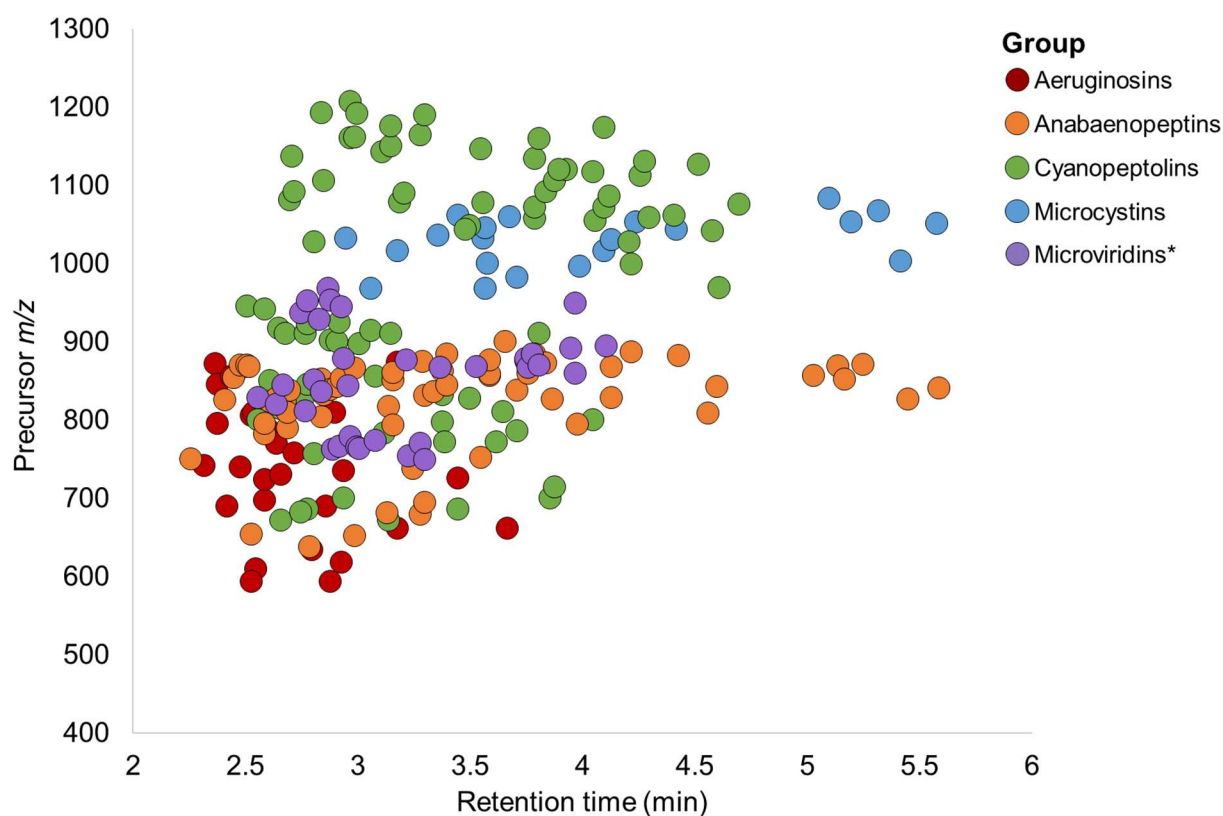**Figure S2.** Plot of the precursor ion  $m/z$  for the 225 cyanopeptides identified within the *Planktothrix* extracts against their retention time. \*Indicates  $[M+2H]^{2+}$  adduct.

**Table S4.** Cyanopeptide characteristic structural features and the diagnostic product ions used to identify cyanopeptide groups.

| Group                  | Structural feature(s)     | Product ion(s) <i>m/z</i>    |
|------------------------|---------------------------|------------------------------|
| <b>Microcystins</b>    | Adda                      | 135.0803, 163.1113           |
|                        | Mdha                      | 213.0865                     |
| <b>Cyanopeptolins</b>  | Lxx-Ahp                   | 181.1331                     |
|                        | Phe-Ahp                   | 215.1167                     |
|                        | Thr-Ahp                   | 169.0967                     |
|                        | Val-Ahp                   | 167.1541                     |
| <b>Aeruginosins</b>    | Choi                      | 140.1099, 122.0966           |
|                        | Agma                      | 281.1914                     |
| <b>Microginins</b>     | Di, Mono, Non-Cl-Ahoa     | 168.0338, 134.0727, 100.1122 |
|                        | Di, Mono, Non-Cl-NMe-Ahoa | 182.0494, 148.0883, 114.1278 |
| <b>Anabaenopeptins</b> | D-Lys                     | 84.0816, 129.1018            |
|                        | Arg-CO                    | 201.0985                     |
|                        | Hty                       | 150.09134                    |
| <b>Cyanobactins</b>    | Tzln                      | 86.0059                      |
|                        | MeOx                      | 84.0448                      |
| <b>Microviridins</b>   | Trp                       | 159.0911                     |

**Table S5.** LC-HRMS data for all cyanopeptides detected within *P. rubescens* CPCC 507, *P. agardhii* CPCC 720, *P. rubescens* CPCC 731, *P. rubescens* CPCC 732, *P. rubescens* CPCC 733, and *Planktothrix* sp. CPCC 735 intracellular extracts.

| No | GNPS Cluster # | CNP group | Cyanopeptide                                        | Structural Feature 1 | Structural Feature 2 | Adduct             | <i>m/z</i> | Mass Error (ppm) | Chemical formula                                                  | RT (min) | 507 | 720 | 731 | 732 | 733 | 735 | Study                   |
|----|----------------|-----------|-----------------------------------------------------|----------------------|----------------------|--------------------|------------|------------------|-------------------------------------------------------------------|----------|-----|-----|-----|-----|-----|-----|-------------------------|
| 1  | N/A            | MC        | MC 1030A                                            | Adda                 |                      | [M+H] <sup>+</sup> | 1031.5197  | 0.10             | C <sub>51</sub> H <sub>70</sub> N <sub>10</sub> O <sub>13</sub>   | 2.95     | X   | X   | X   |     |     |     | This study              |
| 2  | N/A            | MC        | MC 966                                              | Adda                 |                      | [M+H] <sup>+</sup> | 967.5248   | 0.10             | C <sub>47</sub> H <sub>70</sub> N <sub>10</sub> O <sub>12</sub>   | 3.06     |     | X   | X   |     |     |     | This study              |
| 3  | 11             | MC        | MC 1014A                                            | Adda                 |                      | [M+H] <sup>+</sup> | 1015.4915  | -0.20            | C <sub>47</sub> H <sub>70</sub> N <sub>10</sub> O <sub>13</sub> S | 3.18     |     |     | X   |     |     | X   | This study              |
| 4  | 11             | MC        | MC 1034                                             | Adda                 |                      | [M+H] <sup>+</sup> | 1035.5510  | 0.10             | C <sub>51</sub> H <sub>74</sub> N <sub>10</sub> O <sub>13</sub>   | 3.36     |     | X   | X   |     |     |     | This study              |
| 5  | 11             | MC        | MC 1061                                             | Adda                 |                      | [M+H] <sup>+</sup> | 1061.5303  | 0.09             | C <sub>52</sub> H <sub>72</sub> N <sub>10</sub> O <sub>14</sub>   | 3.45     | X   |     | X   |     |     | X   | This study              |
| 6  | 11             | MC        | MC 1030B                                            | Adda                 |                      | [M+H] <sup>+</sup> | 1031.5198  | 0.19             | C <sub>51</sub> H <sub>70</sub> N <sub>10</sub> O <sub>13</sub>   | 3.56     | X   |     | X   |     |     | X   | This study              |
| 7  | 11             | MC        | [Asp <sup>3</sup> ,Dha <sup>7</sup> ]-MC-LR         | Adda                 |                      | [M+H] <sup>+</sup> | 967.5250   | 0.31             | C <sub>47</sub> H <sub>70</sub> N <sub>10</sub> O <sub>12</sub>   | 3.57     |     | X   | X   |     |     | X   | McDonald 2023           |
| 8  | 11             | MC        | [D-Asp <sup>3</sup> ,(E)-Dhb <sup>7</sup> ] MC-HtyR | Adda                 |                      | [M+H] <sup>+</sup> | 1045.5347  | -0.57            | C <sub>52</sub> H <sub>72</sub> N <sub>10</sub> O <sub>13</sub>   | 3.57     | X   |     | X   | X   |     | X   | Isaacs 2011             |
| 9  | 11             | MC        | MC 988                                              | Adda                 |                      | [M+H] <sup>+</sup> | 999.4966   | -0.20            | C <sub>47</sub> H <sub>70</sub> N <sub>10</sub> O <sub>12</sub> S | 3.58     |     |     | X   |     |     | X   | This study              |
| 10 | 11             | MC        | MC 1058                                             | Adda                 |                      | [M+H] <sup>+</sup> | 1059.5507  | -0.28            | C <sub>53</sub> H <sub>74</sub> N <sub>10</sub> O <sub>13</sub>   | 3.68     | X   |     |     |     |     |     | This study              |
| 11 | 11             | MC        | MC 980                                              | Adda                 |                      | [M+H] <sup>+</sup> | 981.5390   | 0.10             | C <sub>48</sub> H <sub>72</sub> N <sub>10</sub> O <sub>12</sub>   | 3.71     | X   |     | X   | X   |     | X   | This study              |
| 12 | 11             | MC        | MC 994                                              | Adda                 |                      | [M+H] <sup>+</sup> | 995.5558   | -0.20            | C <sub>49</sub> H <sub>74</sub> N <sub>10</sub> O <sub>12</sub>   | 3.99     |     |     | X   | X   |     | X   | This study              |
| 13 | 11             | MC        | MC 1014B                                            | Adda                 |                      | [M+H] <sup>+</sup> | 1015.5244  | -0.30            | C <sub>51</sub> H <sub>70</sub> N <sub>10</sub> O <sub>12</sub>   | 4.10     |     |     | X   |     |     | X   | This study              |
| 14 | 11             | MC        | [D-Asp <sup>3</sup> ,(E)-Dhb <sup>7</sup> ] MC-HphR | Adda                 |                      | [M+H] <sup>+</sup> | 1029.5405  | 0.10             | C <sub>52</sub> H <sub>72</sub> N <sub>10</sub> O <sub>12</sub>   | 4.13     | X   |     |     |     |     | X   | Isaacs 2011             |
| 15 | N/A            | MC        | MC 1051A                                            | Adda                 |                      | [M+H] <sup>+</sup> | 1052.4974  | -0.10            | C <sub>55</sub> H <sub>69</sub> N <sub>7</sub> O <sub>14</sub>    | 4.24     |     |     |     |     | X   |     | This study              |
| 16 | 11             | MC        | MC 1042                                             | Adda                 |                      | [M+H] <sup>+</sup> | 1043.5528  | -0.19            | C <sub>53</sub> H <sub>74</sub> N <sub>10</sub> O <sub>12</sub>   | 4.42     | X   |     |     |     |     |     | This study              |
| 17 | 12             | MC        | MC 1081                                             | Adda                 |                      | [M+H] <sup>+</sup> | 1082.5082  | 0.09             | C <sub>56</sub> H <sub>72</sub> O <sub>15</sub> N <sub>7</sub>    | 5.10     |     |     |     |     | X   |     | This study              |
| 18 | 12             | MC        | MC 1051B                                            | Adda                 |                      | [M+H] <sup>+</sup> | 1052.4976  | 0.10             | C <sub>55</sub> H <sub>69</sub> N <sub>7</sub> O <sub>14</sub>    | 5.20     |     |     |     |     | X   |     | This study              |
| 19 | 12             | MC        | MC 1065                                             | Adda                 |                      | [M+H] <sup>+</sup> | 1066.5131  | -0.09            | C <sub>56</sub> H <sub>71</sub> N <sub>7</sub> O <sub>14</sub>    | 5.32     |     |     |     |     | X   |     | This study              |
| 20 | 12             | MC        | MC-LY                                               | Adda                 |                      | [M+H] <sup>+</sup> | 1002.5182  | -0.10            | C <sub>52</sub> H <sub>71</sub> N <sub>7</sub> O <sub>13</sub>    | 5.42     |     |     |     |     | X   |     | del Campo & Ouahid 2010 |

|    |     |    |         |      |                       |                                     |           |       |                                                                                      |      |  |  |   |  |   |   |                  |
|----|-----|----|---------|------|-----------------------|-------------------------------------|-----------|-------|--------------------------------------------------------------------------------------|------|--|--|---|--|---|---|------------------|
| 21 | 12  | MC | MC 1049 | Adda |                       | [M+H] <sup>+</sup>                  | 1050.5182 | -0.10 | C <sub>56</sub> H <sub>72</sub> O <sub>13</sub> N <sub>7</sub>                       | 5.58 |  |  |   |  | X |   | This study       |
| 22 | 4   | AG | AG 740  | Choi | Choi-H <sub>2</sub> O | [M+H] <sup>+</sup>                  | 741.3819  | 0.13  | C <sub>37</sub> H <sub>52</sub> O <sub>10</sub> N <sub>6</sub>                       | 2.32 |  |  | X |  |   |   | This study       |
| 23 | 4   | AG | AG 870  | Choi | Choi-H <sub>2</sub> O | [M+H] <sup>+</sup>                  | 871.2941  | 0.46  | C <sub>32</sub> H <sub>52</sub> O <sub>12</sub> N <sub>10</sub> Cl <sub>2</sub><br>S | 2.37 |  |  |   |  |   | X | This study       |
| 24 | 4   | AG | AG 874  | Choi | Choi-H <sub>2</sub> O | [M+H-SO <sub>3</sub> ] <sup>+</sup> | 795.3921  | -0.25 | C <sub>40</sub> H <sub>54</sub> O <sub>14</sub> N <sub>6</sub> S                     | 2.38 |  |  | X |  |   |   | This study       |
| 25 | 4   | AG | AG 844  | Choi | Choi-H <sub>2</sub> O | [M+H] <sup>+</sup>                  | 845.3384  | -0.24 | C <sub>39</sub> H <sub>52</sub> O <sub>13</sub> N <sub>6</sub> S                     | 2.38 |  |  | X |  |   |   | This study       |
| 26 | 4   | AG | AG 688A | Choi | Choi-H <sub>2</sub> O | [M+H] <sup>+</sup>                  | 689.2962  | -0.15 | C <sub>32</sub> H <sub>44</sub> N <sub>6</sub> O <sub>9</sub> S                      | 2.42 |  |  |   |  |   | X | McDonald<br>2023 |
| 27 | 4   | AG | AG 854  | Choi | Choi-H <sub>2</sub> O | [M+H] <sup>+</sup>                  | 855.2997  | 0.12  | C <sub>37</sub> H <sub>51</sub> O <sub>13</sub> N <sub>6</sub> ClS                   | 2.44 |  |  |   |  |   | X | This study       |
| 28 | 4   | AG | AG 738  | Choi | Choi-H <sub>2</sub> O | [M+H] <sup>+</sup>                  | 739.2524  | 0.14  | C <sub>32</sub> H <sub>43</sub> O <sub>10</sub> N <sub>6</sub> ClS                   | 2.48 |  |  |   |  |   | X | This study       |
| 29 | N/A | AG | AG 672  | Choi | Choi-H <sub>2</sub> O | [M+H-SO <sub>3</sub> ] <sup>+</sup> | 593.3448  | 0.34  | C <sub>32</sub> H <sub>44</sub> N <sub>6</sub> O <sub>8</sub> S                      | 2.53 |  |  | X |  |   |   | This study       |
| 30 | 4   | AG | AG 804  | Choi | Choi-H <sub>2</sub> O | [M+H] <sup>+</sup>                  | 805.3438  | 0.12  | C <sub>37</sub> H <sub>52</sub> O <sub>12</sub> N <sub>6</sub> S                     | 2.53 |  |  | X |  |   |   | This study       |
| 31 | 4   | AG | AG 888A | Choi | Choi-H <sub>2</sub> O | [M+H-SO <sub>3</sub> ] <sup>+</sup> | 809.3445  | 0.12  | C <sub>42</sub> H <sub>60</sub> O <sub>13</sub> N <sub>6</sub> S                     | 2.54 |  |  |   |  |   | X | This study       |
| 32 | 4   | AG | AG 608  | Choi | Choi-H <sub>2</sub> O | [M+H] <sup>+</sup>                  | 609.3391  | -0.66 | C <sub>32</sub> H <sub>45</sub> O <sub>6</sub> N <sub>6</sub>                        | 2.55 |  |  | X |  |   |   | This study       |
| 33 | 4   | AG | AG 696  | Choi | Choi-H <sub>2</sub> O | [M+H] <sup>+</sup>                  | 697.3013  | -0.14 | C <sub>34</sub> H <sub>44</sub> O <sub>8</sub> N <sub>6</sub> S                      | 2.59 |  |  | X |  |   |   | This study       |
| 34 | 4   | AG | AG 722  | Choi | Choi-H <sub>2</sub> O | [M+H] <sup>+</sup>                  | 723.2575  | 0.14  | C <sub>32</sub> H <sub>43</sub> N <sub>6</sub> O <sub>9</sub> ClS                    | 2.59 |  |  |   |  |   | X | McDonald<br>2023 |
| 35 | 4   | AG | AG 787  | Choi | Choi-H <sub>2</sub> O | [M+H] <sup>+</sup>                  | 788.3990  | -0.13 | C <sub>42</sub> H <sub>50</sub> O <sub>5</sub> N <sub>11</sub>                       | 2.60 |  |  | X |  |   |   | This study       |
| 36 | 4   | AG | AG 828  | Choi | Choi-H <sub>2</sub> O | [M+H] <sup>+</sup>                  | 829.3435  | -0.24 | C <sub>39</sub> H <sub>52</sub> O <sub>12</sub> N <sub>6</sub> S                     | 2.60 |  |  | X |  |   |   | This study       |
| 37 | 4   | AG | AG 768  | Choi | Choi-H <sub>2</sub> O | [M+H] <sup>+</sup>                  | 769.2047  | -0.13 | C <sub>37</sub> H <sub>29</sub> O <sub>6</sub> N <sub>12</sub> S                     | 2.64 |  |  |   |  |   | X | This study       |
| 38 | 4   | AG | AG 728  | Choi | Choi-H <sub>2</sub> O | [M+H] <sup>+</sup>                  | 729.4187  | 0.69  | C <sub>37</sub> H <sub>56</sub> O <sub>9</sub> N <sub>6</sub>                        | 2.66 |  |  | X |  |   |   | This study       |
| 39 | 4   | AG | AG 756  | Choi | Choi-H <sub>2</sub> O | [M+H] <sup>+</sup>                  | 757.2180  | -0.40 | C <sub>32</sub> H <sub>42</sub> N <sub>6</sub> O <sub>9</sub> Cl <sub>2</sub> S      | 2.72 |  |  |   |  |   | X | This study       |
| 40 | 4   | AG | AG 632  | Choi | Choi-H <sub>2</sub> O | [M+H] <sup>+</sup>                  | 633.3394  | -0.16 | C <sub>34</sub> H <sub>44</sub> O <sub>6</sub> N <sub>6</sub>                        | 2.80 |  |  | X |  |   |   | This study       |
| 41 | N/A | AG | AG 688B | Choi | Choi-H <sub>2</sub> O | [M+H] <sup>+</sup>                  | 689.3425  | 0.15  | C <sub>23</sub> H <sub>49</sub> O <sub>14</sub> N <sub>10</sub>                      | 2.86 |  |  | X |  |   |   | This study       |
| 42 | 4   | AG | AG 592  | Choi | Choi-H <sub>2</sub> O | [M+H] <sup>+</sup>                  | 593.3447  | 0.17  | C <sub>32</sub> H <sub>44</sub> N <sub>6</sub> O <sub>5</sub>                        | 2.88 |  |  | X |  |   |   | This study       |
| 43 | 4   | AG | AG 888B | Choi | Choi-H <sub>2</sub> O | [M+H-SO <sub>3</sub> ] <sup>+</sup> | 809.4445  | 0.25  | C <sub>42</sub> H <sub>60</sub> O <sub>13</sub> N <sub>6</sub> S                     | 2.90 |  |  | X |  |   |   | This study       |

|    |     |    |          |                                                      |                                               |                                         |          |       |                                                                  |      |   |   |   |  |  |   |                         |
|----|-----|----|----------|------------------------------------------------------|-----------------------------------------------|-----------------------------------------|----------|-------|------------------------------------------------------------------|------|---|---|---|--|--|---|-------------------------|
| 44 | 4   | AG | AG A     | Choi                                                 | Choi-H <sub>2</sub> O                         | [M+H] <sup>+</sup>                      | 617.3448 | 0.32  | C <sub>34</sub> H <sub>44</sub> N <sub>6</sub> O <sub>5</sub>    | 2.93 |   |   | X |  |  |   | Cy-<br>anoMetDB<br>2023 |
| 45 | 4   | AG | AG 733   | Choi                                                 | Choi-H <sub>2</sub> O                         | [M+H] <sup>+</sup>                      | 734.4239 | 0.41  | C <sub>39</sub> H <sub>55</sub> O <sub>7</sub> N <sub>7</sub>    | 2.94 |   |   | X |  |  |   | This study              |
| 46 | N/A | AG | AG 660A  | Choi                                                 | Choi-H <sub>2</sub> O                         | [M+H] <sup>+</sup>                      | 661.4070 | -0.30 | C <sub>37</sub> H <sub>52</sub> O <sub>5</sub> N <sub>6</sub>    | 3.18 |   |   | X |  |  |   | This study              |
| 47 | 4   | AG | AG 872   | Choi                                                 | Choi-H <sub>2</sub> O                         | [M+H] <sup>+</sup>                      | 873.4064 | 0.11  | C <sub>42</sub> H <sub>60</sub> O <sub>12</sub> N <sub>6</sub> S | 3.18 |   |   | X |  |  |   | This study              |
| 48 | 4   | AG | AG 724   | Choi                                                 | Choi-H <sub>2</sub> O                         | [M+H] <sup>+</sup>                      | 725.3851 | 0.14  | C <sub>49</sub> H <sub>49</sub> O <sub>2</sub> N <sub>4</sub>    | 3.45 |   |   |   |  |  | X | This study              |
| 49 | 4   | AG | AG 660B  | Choi                                                 | Choi-H <sub>2</sub> O                         | [M+H] <sup>+</sup>                      | 661.4069 | -0.45 | C <sub>37</sub> H <sub>52</sub> O <sub>5</sub> N <sub>6</sub>    | 3.67 |   |   | X |  |  |   | This study              |
| 50 | 3   | CP | CP T864  | [Thr-Ahp-<br>H <sub>2</sub> O-<br>CO+H] <sup>+</sup> | [Thr-Ahp-<br>H <sub>2</sub> O+H] <sup>+</sup> | [M+H] <sup>+</sup>                      | 865.4134 | 0.35  | C <sub>47</sub> H <sub>56</sub> O <sub>10</sub> N <sub>6</sub>   | 2.48 |   |   |   |  |  | X | This study              |
| 51 | 3   | CP | CP T944  | [Thr-Ahp-<br>H <sub>2</sub> O-<br>CO+H] <sup>+</sup> | [Thr-Ahp-<br>H <sub>2</sub> O+H] <sup>+</sup> | [M+H] <sup>+</sup>                      | 945.5039 | -0.11 | C <sub>44</sub> H <sub>68</sub> O <sub>13</sub> N <sub>10</sub>  | 2.51 |   |   |   |  |  | X | This study              |
| 52 | 3   | CP | CP T816A | [Thr-Ahp-<br>H <sub>2</sub> O-<br>CO+H] <sup>+</sup> | [Thr-Ahp-<br>H <sub>2</sub> O+H] <sup>+</sup> | [M+H-<br>H <sub>2</sub> O] <sup>+</sup> | 799.4348 | -0.13 | C <sub>39</sub> H <sub>60</sub> O <sub>11</sub> N <sub>8</sub>   | 2.56 | X | X |   |  |  | X | This study              |
| 53 | 3   | CP | CP T958  | [Thr-Ahp-<br>H <sub>2</sub> O-<br>CO+H] <sup>+</sup> | [Thr-Ahp-<br>H <sub>2</sub> O+H] <sup>+</sup> | [M+H-<br>H <sub>2</sub> O] <sup>+</sup> | 941.5082 | 0.42  | C <sub>44</sub> H <sub>74</sub> O <sub>17</sub> N <sub>6</sub>   | 2.59 |   |   |   |  |  | X | This study              |
| 54 | 3   | CP | CP T848  | [Thr-Ahp-<br>H <sub>2</sub> O-<br>CO+H] <sup>+</sup> | [Thr-Ahp-<br>H <sub>2</sub> O+H] <sup>+</sup> | [M+H] <sup>+</sup>                      | 849.4159 | -0.12 | C <sub>30</sub> H <sub>62</sub> O <sub>18</sub> N <sub>10</sub>  | 2.61 |   |   |   |  |  | X | This study              |
| 55 | 3   | CP | CP T915  | [Thr-Ahp-<br>H <sub>2</sub> O-<br>CO+H] <sup>+</sup> | [Thr-Ahp-<br>H <sub>2</sub> O+H] <sup>+</sup> | [M+H] <sup>+</sup>                      | 916.5135 | -0.33 | C <sub>44</sub> H <sub>69</sub> O <sub>12</sub> N <sub>9</sub>   | 2.65 | X |   |   |  |  |   | This study              |
| 56 | 3   | CP | CP T688A | [Thr-Ahp-<br>H <sub>2</sub> O-<br>CO+H] <sup>+</sup> | [Thr-Ahp-<br>H <sub>2</sub> O+H] <sup>+</sup> | [M+H-<br>H <sub>2</sub> O] <sup>+</sup> | 671.3765 | 0.30  | C <sub>34</sub> H <sub>52</sub> O <sub>9</sub> N <sub>6</sub>    | 2.66 |   | X |   |  |  |   | This study              |
| 57 | 3   | CP | CP T830A | [Thr-Ahp-<br>H <sub>2</sub> O-<br>CO+H] <sup>+</sup> | [Thr-Ahp-<br>H <sub>2</sub> O+H] <sup>+</sup> | [M+H-<br>H <sub>2</sub> O] <sup>+</sup> | 813.4503 | -0.25 | C <sub>40</sub> H <sub>62</sub> O <sub>11</sub> N <sub>8</sub>   | 2.66 | X | X |   |  |  | X | This study              |

|    |           |    |          |                                              |                                           |                                     |           |       |                                                                 |      |   |   |  |  |  |   |            |
|----|-----------|----|----------|----------------------------------------------|-------------------------------------------|-------------------------------------|-----------|-------|-----------------------------------------------------------------|------|---|---|--|--|--|---|------------|
| 58 | N/A       | CP | CP T927A | [Thr-Ahp-H <sub>2</sub> O-CO+H] <sup>+</sup> | [Thr-Ahp-H <sub>2</sub> O+H] <sup>+</sup> | [M+H-H <sub>2</sub> O] <sup>+</sup> | 910.5018  | -0.11 | C <sub>44</sub> H <sub>73</sub> O <sub>16</sub> N <sub>5</sub>  | 2.68 | X | X |  |  |  |   | This study |
| 59 | 3         | CP | CP T1079 | [Thr-Ahp-H <sub>2</sub> O-CO+H] <sup>+</sup> | [Thr-Ahp-H <sub>2</sub> O+H] <sup>+</sup> | [M+H] <sup>+</sup>                  | 1080.5229 | -0.09 | C <sub>64</sub> H <sub>69</sub> O <sub>9</sub> N <sub>7</sub>   | 2.70 |   | X |  |  |  |   | This study |
| 60 | 3         | CP | CP T1135 | [Thr-Ahp-H <sub>2</sub> O-CO+H] <sup>+</sup> | [Thr-Ahp-H <sub>2</sub> O+H] <sup>+</sup> | [M+H] <sup>+</sup>                  | 1136.5985 | -0.09 | C <sub>55</sub> H <sub>81</sub> O <sub>15</sub> N <sub>11</sub> | 2.71 |   |   |  |  |  | X | This study |
| 61 | 3         | CP | CP T1090 | [Thr-Ahp-H <sub>2</sub> O-CO+H] <sup>+</sup> | [Thr-Ahp-H <sub>2</sub> O+H] <sup>+</sup> | [M+H] <sup>+</sup>                  | 1091.5759 | 0.09  | C <sub>53</sub> H <sub>82</sub> O <sub>18</sub> N <sub>6</sub>  | 2.72 | X |   |  |  |  |   | This study |
| 62 | 3         | CP | CP T844A | [Thr-Ahp-H <sub>2</sub> O-CO+H] <sup>+</sup> | [Thr-Ahp-H <sub>2</sub> O+H] <sup>+</sup> | [M+H-H <sub>2</sub> O] <sup>+</sup> | 827.4663  | 0.12  | C <sub>41</sub> H <sub>64</sub> O <sub>11</sub> N <sub>8</sub>  | 2.76 | X |   |  |  |  | X | This study |
| 63 | 3         | CP | CP T927B | [Thr-Ahp-H <sub>2</sub> O-CO+H] <sup>+</sup> | [Thr-Ahp-H <sub>2</sub> O+H] <sup>+</sup> | [M+H-H <sub>2</sub> O] <sup>+</sup> | 910.4667  | -0.21 | C <sub>44</sub> H <sub>65</sub> O <sub>13</sub> N <sub>9</sub>  | 2.77 |   |   |  |  |  | X | This study |
| 64 | 3         | CP | CP T702A | [Thr-Ahp-H <sub>2</sub> O-CO+H] <sup>+</sup> | [Thr-Ahp-H <sub>2</sub> O+H] <sup>+</sup> | [M+H-H <sub>2</sub> O] <sup>+</sup> | 685.3918  | -0.15 | C <sub>35</sub> H <sub>54</sub> O <sub>9</sub> N <sub>6</sub>   | 2.78 | X | X |  |  |  | X | This study |
| 65 | Ind. Node | CP | CP T939  | [Thr-Ahp-H <sub>2</sub> O-CO+H] <sup>+</sup> | [Thr-Ahp-H <sub>2</sub> O+H] <sup>+</sup> | [M+H-H <sub>2</sub> O] <sup>+</sup> | 922.5018  | -0.11 | C <sub>45</sub> H <sub>73</sub> O <sub>16</sub> N <sub>5</sub>  | 2.78 | X |   |  |  |  |   | This study |
| 66 | 3         | CP | CP T1044 | [Thr-Ahp-H <sub>2</sub> O-CO+H] <sup>+</sup> | [Thr-Ahp-H <sub>2</sub> O+H] <sup>+</sup> | [M+H-H <sub>2</sub> O] <sup>+</sup> | 1027.5296 | 0.10  | C <sub>48</sub> H <sub>72</sub> O <sub>16</sub> N <sub>10</sub> | 2.81 |   |   |  |  |  | X | This study |
| 67 | 3         | CP | CP T773  | [Thr-Ahp-H <sub>2</sub> O-CO+H] <sup>+</sup> | [Thr-Ahp-H <sub>2</sub> O+H] <sup>+</sup> | [M+H-H <sub>2</sub> O] <sup>+</sup> | 756.4292  | 0.13  | C <sub>38</sub> H <sub>59</sub> O <sub>10</sub> N <sub>7</sub>  | 2.81 | X |   |  |  |  |   | This study |
| 68 | 3         | CP | CP T1209 | [Thr-Ahp-H <sub>2</sub> O-CO+H] <sup>+</sup> | [Thr-Ahp-H <sub>2</sub> O+H] <sup>+</sup> | [M+H-H <sub>2</sub> O] <sup>+</sup> | 1192.5886 | 0.08  | C <sub>57</sub> H <sub>83</sub> O <sub>18</sub> N <sub>11</sub> | 2.84 |   |   |  |  |  | X | This study |



|    |   |    |          |                                              |                                           |                                     |           |       |                                                                 |      |   |   |  |  |  |   |            |
|----|---|----|----------|----------------------------------------------|-------------------------------------------|-------------------------------------|-----------|-------|-----------------------------------------------------------------|------|---|---|--|--|--|---|------------|
| 69 | 3 | CP | CP T1104 | [Thr-Ahp-H <sub>2</sub> O-CO+H] <sup>+</sup> | [Thr-Ahp-H <sub>2</sub> O+H] <sup>+</sup> | [M+H] <sup>+</sup>                  | 1105.5929 | 0.09  | C <sub>55</sub> H <sub>81</sub> O <sub>14</sub> N <sub>10</sub> | 2.85 | X | X |  |  |  |   | This study |
| 70 | 3 | CP | CP T918  | [Thr-Ahp-H <sub>2</sub> O-CO+H] <sup>+</sup> | [Thr-Ahp-H <sub>2</sub> O+H] <sup>+</sup> | [M+H-H <sub>2</sub> O] <sup>+</sup> | 901.4665  | -0.11 | C <sub>43</sub> H <sub>66</sub> O <sub>14</sub> N <sub>8</sub>  | 2.88 | X |   |  |  |  |   | This study |
| 71 | 3 | CP | CP T916  | [Thr-Ahp-H <sub>2</sub> O-CO+H] <sup>+</sup> | [Thr-Ahp-H <sub>2</sub> O+H] <sup>+</sup> | [M+H-H <sub>2</sub> O] <sup>+</sup> | 899.4507  | -0.22 | C <sub>43</sub> H <sub>64</sub> O <sub>14</sub> N <sub>8</sub>  | 2.91 | X | X |  |  |  | X | This study |
| 72 | 3 | CP | CP T941  | [Thr-Ahp-H <sub>2</sub> O-CO+H] <sup>+</sup> | [Thr-Ahp-H <sub>2</sub> O+H] <sup>+</sup> | [M+H-H <sub>2</sub> O] <sup>+</sup> | 924.4822  | -0.32 | C <sub>45</sub> H <sub>67</sub> O <sub>13</sub> N <sub>9</sub>  | 2.92 |   |   |  |  |  | X | This study |
| 73 | 3 | CP | CP T716A | [Thr-Ahp-H <sub>2</sub> O-CO+H] <sup>+</sup> | [Thr-Ahp-H <sub>2</sub> O+H] <sup>+</sup> | [M+H-H <sub>2</sub> O] <sup>+</sup> | 699.4075  | -0.14 | C <sub>36</sub> H <sub>56</sub> O <sub>9</sub> N <sub>6</sub>   | 2.94 |   | X |  |  |  |   | This study |
| 74 | 3 | CP | CP T1177 | [Thr-Ahp-H <sub>2</sub> O-CO+H] <sup>+</sup> | [Thr-Ahp-H <sub>2</sub> O+H] <sup>+</sup> | [M+H-H <sub>2</sub> O] <sup>+</sup> | 1160.5664 | 0.09  | C <sub>61</sub> H <sub>79</sub> O <sub>15</sub> N <sub>9</sub>  | 2.97 |   |   |  |  |  | X | This study |
| 75 | 3 | CP | CP T1223 | [Thr-Ahp-H <sub>2</sub> O-CO+H] <sup>+</sup> | [Thr-Ahp-H <sub>2</sub> O+H] <sup>+</sup> | [M+H-H <sub>2</sub> O] <sup>+</sup> | 1206.6038 | -0.24 | C <sub>58</sub> H <sub>85</sub> O <sub>18</sub> N <sub>11</sub> | 2.97 |   |   |  |  |  | X | This study |
| 76 | 3 | CP | CP T1178 | [Thr-Ahp-H <sub>2</sub> O-CO+H] <sup>+</sup> | [Thr-Ahp-H <sub>2</sub> O+H] <sup>+</sup> | [M+H-H <sub>2</sub> O] <sup>+</sup> | 1161.5826 | -0.09 | C <sub>57</sub> H <sub>82</sub> O <sub>17</sub> N <sub>10</sub> | 2.99 | X | X |  |  |  |   | This study |
| 77 | 3 | CP | CP T1208 | [Thr-Ahp-H <sub>2</sub> O-CO+H] <sup>+</sup> | [Thr-Ahp-H <sub>2</sub> O+H] <sup>+</sup> | [M+H-H <sub>2</sub> O] <sup>+</sup> | 1191.5933 | 0.08  | C <sub>58</sub> H <sub>84</sub> O <sub>18</sub> N <sub>10</sub> | 3.00 | X |   |  |  |  |   | This study |
| 78 | 3 | CP | CP T913  | [Thr-Ahp-H <sub>2</sub> O-CO+H] <sup>+</sup> | [Thr-Ahp-H <sub>2</sub> O+H] <sup>+</sup> | [M+H-H <sub>2</sub> O] <sup>+</sup> | 896.4865  | -0.11 | C <sub>44</sub> H <sub>67</sub> O <sub>12</sub> N <sub>9</sub>  | 3.01 | X | X |  |  |  |   | This study |
| 79 | 3 | CP | CP T930  | [Thr-Ahp-H <sub>2</sub> O-CO+H] <sup>+</sup> | [Thr-Ahp-H <sub>2</sub> O+H] <sup>+</sup> | [M+H-H <sub>2</sub> O] <sup>+</sup> | 913.4662  | -0.33 | C <sub>44</sub> H <sub>66</sub> O <sub>14</sub> N <sub>8</sub>  | 3.06 |   | X |  |  |  |   | This study |

|    |   |    |          |                                              |                                           |                                     |           |       |                                                                 |      |   |   |  |  |  |   |            |
|----|---|----|----------|----------------------------------------------|-------------------------------------------|-------------------------------------|-----------|-------|-----------------------------------------------------------------|------|---|---|--|--|--|---|------------|
| 80 | 3 | CP | CP T872  | [Thr-Ahp-H <sub>2</sub> O-CO+H] <sup>+</sup> | [Thr-Ahp-H <sub>2</sub> O+H] <sup>+</sup> | [M+H-H <sub>2</sub> O] <sup>+</sup> | 855.4609  | -0.23 | C <sub>42</sub> H <sub>64</sub> O <sub>12</sub> N <sub>8</sub>  | 3.08 | X |   |  |  |  |   | This study |
| 81 | 3 | CP | CP T1159 | [Thr-Ahp-H <sub>2</sub> O-CO+H] <sup>+</sup> | [Thr-Ahp-H <sub>2</sub> O+H] <sup>+</sup> | [M+H-H <sub>2</sub> O] <sup>+</sup> | 1142.6095 | 0.26  | C <sub>54</sub> H <sub>85</sub> O <sub>17</sub> N <sub>11</sub> | 3.11 |   |   |  |  |  | X | This study |
| 82 | 3 | CP | CP T799  | [Thr-Ahp-H <sub>2</sub> O-CO+H] <sup>+</sup> | [Thr-Ahp-H <sub>2</sub> O+H] <sup>+</sup> | [M+H-H <sub>2</sub> O] <sup>+</sup> | 782.4081  | -0.26 | C <sub>39</sub> H <sub>57</sub> O <sub>11</sub> N <sub>7</sub>  | 3.12 |   | X |  |  |  | X | This study |
| 83 | 3 | CP | CP T688B | [Thr-Ahp-H <sub>2</sub> O-CO+H] <sup>+</sup> | [Thr-Ahp-H <sub>2</sub> O+H] <sup>+</sup> | [M+H-H <sub>2</sub> O] <sup>+</sup> | 671.3762  | -0.14 | C <sub>34</sub> H <sub>52</sub> O <sub>9</sub> N <sub>6</sub>   | 3.14 |   | X |  |  |  |   | This study |
| 84 | 3 | CP | CP T1166 | [Thr-Ahp-H <sub>2</sub> O-CO+H] <sup>+</sup> | [Thr-Ahp-H <sub>2</sub> O+H] <sup>+</sup> | [M+H-H <sub>2</sub> O] <sup>+</sup> | 1149.5828 | 0.09  | C <sub>56</sub> H <sub>82</sub> O <sub>17</sub> N <sub>10</sub> | 3.15 | X |   |  |  |  |   | This study |
| 85 | 3 | CP | CP T1192 | [Thr-Ahp-H <sub>2</sub> O-CO+H] <sup>+</sup> | [Thr-Ahp-H <sub>2</sub> O+H] <sup>+</sup> | [M+H-H <sub>2</sub> O] <sup>+</sup> | 1175.5964 | -0.09 | C <sub>70</sub> H <sub>80</sub> O <sub>10</sub> N <sub>8</sub>  | 3.15 | X | X |  |  |  |   | This study |
| 86 | 3 | CP | CP T927C | [Thr-Ahp-H <sub>2</sub> O-CO+H] <sup>+</sup> | [Thr-Ahp-H <sub>2</sub> O+H] <sup>+</sup> | [M+H-H <sub>2</sub> O] <sup>+</sup> | 910.5030  | -0.33 | C <sub>45</sub> H <sub>69</sub> O <sub>12</sub> N <sub>9</sub>  | 3.15 | X | X |  |  |  |   | This study |
| 87 | 3 | CP | CP T1095 | [Thr-Ahp-H <sub>2</sub> O-CO+H] <sup>+</sup> | [Thr-Ahp-H <sub>2</sub> O+H] <sup>+</sup> | [M+H-H <sub>2</sub> O] <sup>+</sup> | 1078.5436 | -0.09 | C <sub>65</sub> H <sub>73</sub> O <sub>9</sub> N <sub>7</sub>   | 3.19 | X |   |  |  |  | X | This study |
| 88 | 3 | CP | CP T1088 | [Thr-Ahp-H <sub>2</sub> O-CO+H] <sup>+</sup> | [Thr-Ahp-H <sub>2</sub> O+H] <sup>+</sup> | [M+H] <sup>+</sup>                  | 1089.5967 | 0.09  | C <sub>54</sub> H <sub>84</sub> O <sub>17</sub> N <sub>6</sub>  | 3.21 | X |   |  |  |  |   | This study |
| 89 | 3 | CP | CP T1180 | [Thr-Ahp-H <sub>2</sub> O-CO+H] <sup>+</sup> | [Thr-Ahp-H <sub>2</sub> O+H] <sup>+</sup> | [M+H-H <sub>2</sub> O] <sup>+</sup> | 1163.5985 | 0.17  | C <sub>57</sub> H <sub>84</sub> O <sub>17</sub> N <sub>10</sub> | 3.28 | X |   |  |  |  |   | This study |
| 90 | 3 | CP | CP T1206 | [Thr-Ahp-H <sub>2</sub> O-CO+H] <sup>+</sup> | [Thr-Ahp-H <sub>2</sub> O+H] <sup>+</sup> | [M+H-H <sub>2</sub> O] <sup>+</sup> | 1189.6139 | -0.08 | C <sub>59</sub> H <sub>86</sub> O <sub>17</sub> N <sub>10</sub> | 3.30 |   | X |  |  |  |   | This study |

|     |           |    |          |                                              |                                           |                                     |           |       |                                                                |      |   |   |  |  |  |   |            |
|-----|-----------|----|----------|----------------------------------------------|-------------------------------------------|-------------------------------------|-----------|-------|----------------------------------------------------------------|------|---|---|--|--|--|---|------------|
| 91  | 3         | CP | CP T813  | [Thr-Ahp-H <sub>2</sub> O-CO+H] <sup>+</sup> | [Thr-Ahp-H <sub>2</sub> O+H] <sup>+</sup> | [M+H-H <sub>2</sub> O] <sup>+</sup> | 796.4238  | -0.25 | C <sub>40</sub> H <sub>59</sub> O <sub>11</sub> N <sub>7</sub> | 3.38 | X | X |  |  |  | X | This study |
| 92  | 3         | CP | CP T830B | [Thr-Ahp-H <sub>2</sub> O-CO+H] <sup>+</sup> | [Thr-Ahp-H <sub>2</sub> O+H] <sup>+</sup> | [M+H] <sup>+</sup>                  | 831.4612  | 0.12  | C <sub>40</sub> H <sub>62</sub> O <sub>11</sub> N <sub>8</sub> | 3.38 |   | X |  |  |  |   | This study |
| 93  | N/A       | CP | CP T788A | [Thr-Ahp-H <sub>2</sub> O-CO+H] <sup>+</sup> | [Thr-Ahp-H <sub>2</sub> O+H] <sup>+</sup> | [M+H-H <sub>2</sub> O] <sup>+</sup> | 771.3920  | -0.39 | C <sub>38</sub> H <sub>56</sub> O <sub>12</sub> N <sub>6</sub> | 3.39 |   | X |  |  |  |   | This study |
| 94  | 3         | CP | CP T702B | [Thr-Ahp-H <sub>2</sub> O-CO+H] <sup>+</sup> | [Thr-Ahp-H <sub>2</sub> O+H] <sup>+</sup> | [M+H-H <sub>2</sub> O] <sup>+</sup> | 685.3920  | 0.15  | C <sub>35</sub> H <sub>54</sub> O <sub>9</sub> N <sub>6</sub>  | 3.45 |   | X |  |  |  | X | This study |
| 95  | Ind. Node | CP | CP T1064 | [Thr-Ahp-H <sub>2</sub> O-CO+H] <sup>+</sup> | [Thr-Ahp-H <sub>2</sub> O+H] <sup>+</sup> | [M+H-H <sub>2</sub> O] <sup>+</sup> | 1047.5394 | -0.29 | C <sub>53</sub> H <sub>76</sub> O <sub>15</sub> N <sub>8</sub> | 3.50 | X |   |  |  |  |   | This study |
| 96  | 3         | CP | CP T844B | [Thr-Ahp-H <sub>2</sub> O-CO+H] <sup>+</sup> | [Thr-Ahp-H <sub>2</sub> O+H] <sup>+</sup> | [M+H-H <sub>2</sub> O] <sup>+</sup> | 827.4297  | -0.12 | C <sub>40</sub> H <sub>60</sub> O <sub>12</sub> N <sub>8</sub> | 3.50 |   |   |  |  |  | X | This study |
| 97  | 3         | CP | CP T1162 | [Thr-Ahp-H <sub>2</sub> O-CO+H] <sup>+</sup> | [Thr-Ahp-H <sub>2</sub> O+H] <sup>+</sup> | [M+H-H <sub>2</sub> O] <sup>+</sup> | 1145.5861 | 0.17  | C <sub>69</sub> H <sub>78</sub> O <sub>9</sub> N <sub>8</sub>  | 3.55 | X |   |  |  |  |   | This study |
| 98  | 3         | CP | CP T788B | [Thr-Ahp-H <sub>2</sub> O-CO+H] <sup>+</sup> | [Thr-Ahp-H <sub>2</sub> O+H] <sup>+</sup> | [M+H-H <sub>2</sub> O] <sup>+</sup> | 771.3922  | -0.12 | C <sub>38</sub> H <sub>56</sub> O <sub>12</sub> N <sub>6</sub> | 3.62 | X | X |  |  |  | X | This study |
| 99  | 3         | CP | CP T827  | [Thr-Ahp-H <sub>2</sub> O-CO+H] <sup>+</sup> | [Thr-Ahp-H <sub>2</sub> O+H] <sup>+</sup> | [M+H-H <sub>2</sub> O] <sup>+</sup> | 810.4395  | -0.12 | C <sub>41</sub> H <sub>61</sub> O <sub>11</sub> N <sub>7</sub> | 3.65 |   | X |  |  |  |   | This study |
| 100 | 3         | CP | CP T802  | [Thr-Ahp-H <sub>2</sub> O-CO+H] <sup>+</sup> | [Thr-Ahp-H <sub>2</sub> O+H] <sup>+</sup> | [M+H-H <sub>2</sub> O] <sup>+</sup> | 785.4081  | 0.13  | C <sub>39</sub> H <sub>58</sub> O <sub>12</sub> N <sub>6</sub> | 3.71 |   | X |  |  |  |   | This study |
| 101 | 3         | CP | CP T1150 | [Thr-Ahp-H <sub>2</sub> O-CO+H] <sup>+</sup> | [Thr-Ahp-H <sub>2</sub> O+H] <sup>+</sup> | [M+H-H <sub>2</sub> O] <sup>+</sup> | 1133.5863 | -0.09 | C <sub>55</sub> H <sub>86</sub> O <sub>20</sub> N <sub>6</sub> | 3.79 | X |   |  |  |  |   | This study |

|     |     |    |          |                                              |                                           |                                     |           |       |                                                                  |      |   |   |   |   |  |  |            |
|-----|-----|----|----------|----------------------------------------------|-------------------------------------------|-------------------------------------|-----------|-------|------------------------------------------------------------------|------|---|---|---|---|--|--|------------|
| 102 | 3   | CP | CP T1176 | [Thr-Ahp-H <sub>2</sub> O-CO+H] <sup>+</sup> | [Thr-Ahp-H <sub>2</sub> O+H] <sup>+</sup> | [M+H-H <sub>2</sub> O] <sup>+</sup> | 1159.6023 | 0.17  | C <sub>57</sub> H <sub>88</sub> O <sub>20</sub> N <sub>6</sub>   | 3.81 | X | X |   |   |  |  | This study |
| 103 | N/A | CP | CP T927D | [Thr-Ahp-H <sub>2</sub> O-CO+H] <sup>+</sup> | [Thr-Ahp-H <sub>2</sub> O+H] <sup>+</sup> | [M+H-H <sub>2</sub> O] <sup>+</sup> | 910.5032  | -0.11 | C <sub>45</sub> H <sub>69</sub> O <sub>12</sub> N <sub>9</sub>   | 3.81 | X |   |   |   |  |  | This study |
| 104 | N/A | CP | CP T716B | [Thr-Ahp-H <sub>2</sub> O-CO+H] <sup>+</sup> | [Thr-Ahp-H <sub>2</sub> O+H] <sup>+</sup> | [M+H-H <sub>2</sub> O] <sup>+</sup> | 699.4075  | -0.14 | C <sub>36</sub> H <sub>56</sub> O <sub>9</sub> N <sub>6</sub>    | 3.86 |   | X |   |   |  |  | This study |
| 105 | 3   | CP | CP T730  | [Thr-Ahp-H <sub>2</sub> O-CO+H] <sup>+</sup> | [Thr-Ahp-H <sub>2</sub> O+H] <sup>+</sup> | [M+H-H <sub>2</sub> O] <sup>+</sup> | 713.3870  | 0.14  | C <sub>36</sub> H <sub>54</sub> O <sub>10</sub> N <sub>6</sub>   | 3.88 |   | X |   |   |  |  | This study |
| 106 | N/A | CP | CP T816B | [Thr-Ahp-H <sub>2</sub> O-CO+H] <sup>+</sup> | [Thr-Ahp-H <sub>2</sub> O+H] <sup>+</sup> | [M+H-H <sub>2</sub> O] <sup>+</sup> | 799.4235  | -0.12 | C <sub>40</sub> H <sub>60</sub> O <sub>12</sub> N <sub>6</sub>   | 4.05 |   | X |   |   |  |  | This study |
| 107 | 3   | CP | CP T1190 | [Thr-Ahp-H <sub>2</sub> O-CO+H] <sup>+</sup> | [Thr-Ahp-H <sub>2</sub> O+H] <sup>+</sup> | [M+H-H <sub>2</sub> O] <sup>+</sup> | 1173.6189 | -0.09 | C <sub>59</sub> H <sub>86</sub> O <sub>16</sub> N <sub>10</sub>  | 4.10 | X |   |   |   |  |  | This study |
| 108 | 3   | CP | CP T1075 | [Thr-Ahp-H <sub>2</sub> O-CO+H] <sup>+</sup> | [Thr-Ahp-H <sub>2</sub> O+H] <sup>+</sup> | [M+H-H <sub>2</sub> O] <sup>+</sup> | 1058.5558 | 0.09  | C <sub>54</sub> H <sub>77</sub> O <sub>14</sub> N <sub>9</sub>   | 4.30 | X |   |   |   |  |  | This study |
| 109 | N/A | CP | CP P680  | [Phe-Ahp-H <sub>2</sub> O-CO+H] <sup>+</sup> | [Phe-Ahp-H <sub>2</sub> O+H] <sup>+</sup> | [M+H] <sup>+</sup>                  | 681.3972  | 0.29  | C <sub>36</sub> H <sub>52</sub> O <sub>7</sub> N <sub>6</sub>    | 2.75 |   |   | X |   |  |  | This study |
| 110 | 1   | CP | CP L1060 | [Lxx-Ahp-H <sub>2</sub> O-CO+H] <sup>+</sup> | [Lxx-Ahp-H <sub>2</sub> O+H] <sup>+</sup> | [M+H-H <sub>2</sub> O] <sup>+</sup> | 1043.4752 | -0.19 | C <sub>49</sub> H <sub>72</sub> O <sub>16</sub> N <sub>8</sub> S | 3.48 |   |   | X | X |  |  | This study |
| 111 | 1   | CP | CP P1094 | [Phe-Ahp-H <sub>2</sub> O-CO+H] <sup>+</sup> | [Phe-Ahp-H <sub>2</sub> O+H] <sup>+</sup> | [M+H-H <sub>2</sub> O] <sup>+</sup> | 1077.4578 | -0.09 | C <sub>64</sub> H <sub>66</sub> O <sub>9</sub> N <sub>6</sub> S  | 3.56 |   |   | X | X |  |  | This study |
| 112 | 2   | CP | CP L1074 | [Lxx-Ahp-H <sub>2</sub> O-CO+H] <sup>+</sup> | [Lxx-Ahp-H <sub>2</sub> O+H] <sup>+</sup> | [M+H-H <sub>2</sub> O] <sup>+</sup> | 1057.4897 | 0.47  | C <sub>62</sub> H <sub>70</sub> O <sub>9</sub> N <sub>6</sub> S  | 3.79 |   |   | X | X |  |  | This study |

|     |           |    |          |                                              |                                           |                                     |           |       |                                                                  |      |  |  |   |   |  |  |            |
|-----|-----------|----|----------|----------------------------------------------|-------------------------------------------|-------------------------------------|-----------|-------|------------------------------------------------------------------|------|--|--|---|---|--|--|------------|
| 113 | 1         | CP | CP L1088 | [Lxx-Ahp-H <sub>2</sub> O-CO+H] <sup>+</sup> | [Lxx-Ahp-H <sub>2</sub> O+H] <sup>+</sup> | [M+H-H <sub>2</sub> O] <sup>+</sup> | 1071.5065 | -0.19 | C <sub>51</sub> H <sub>76</sub> N <sub>8</sub> O <sub>16</sub> S | 3.79 |  |  |   | X |  |  | This study |
| 114 | 1         | CP | CP P1108 | [Phe-Ahp-H <sub>2</sub> O-CO+H] <sup>+</sup> | [Phe-Ahp-H <sub>2</sub> O+H] <sup>+</sup> | [M+H-H <sub>2</sub> O] <sup>+</sup> | 1091.4738 | 0.18  | C <sub>65</sub> H <sub>68</sub> O <sub>9</sub> N <sub>6</sub> S  | 3.84 |  |  |   | X |  |  | This study |
| 115 | 1         | CP | CP P1122 | [Phe-Ahp-H <sub>2</sub> O-CO+H] <sup>+</sup> | [Phe-Ahp-H <sub>2</sub> O+H] <sup>+</sup> | [M+H-H <sub>2</sub> O] <sup>+</sup> | 1105.4896 | 0.36  | C <sub>66</sub> H <sub>70</sub> O <sub>9</sub> N <sub>6</sub> S  | 3.88 |  |  | X | X |  |  | This study |
| 116 | 2         | CP | CP P1136 | [Phe-Ahp-H <sub>2</sub> O-CO+H] <sup>+</sup> | [Phe-Ahp-H <sub>2</sub> O+H] <sup>+</sup> | [M+H-H <sub>2</sub> O] <sup>+</sup> | 1119.5065 | -0.18 | C <sub>55</sub> H <sub>76</sub> O <sub>16</sub> N <sub>8</sub> S | 3.90 |  |  | X | X |  |  | This study |
| 117 | 2         | CP | CP P1115 | [Phe-Ahp-H <sub>2</sub> O-CO+H] <sup>+</sup> | [Phe-Ahp-H <sub>2</sub> O+H] <sup>+</sup> | [M+H] <sup>+</sup>                  | 1116.4595 | 0.09  | C <sub>55</sub> H <sub>69</sub> O <sub>16</sub> N <sub>7</sub> S | 4.05 |  |  | X |   |  |  | This study |
| 118 | Ind. Node | CP | CP P1053 | [Phe-Ahp-H <sub>2</sub> O-CO+H] <sup>+</sup> | [Phe-Ahp-H <sub>2</sub> O+H] <sup>+</sup> | [M+H] <sup>+</sup>                  | 1054.5359 | 0.28  | C <sub>53</sub> H <sub>71</sub> O <sub>12</sub> N <sub>11</sub>  | 4.06 |  |  | X |   |  |  | This study |
| 119 | 1         | CP | CP V1088 | [Val-Ahp-H <sub>2</sub> O-CO+H] <sup>+</sup> | [Val-Ahp-H <sub>2</sub> O+H] <sup>+</sup> | [M+H-H <sub>2</sub> O] <sup>+</sup> | 1071.5065 | -0.18 | C <sub>51</sub> H <sub>76</sub> O <sub>16</sub> N <sub>8</sub> S | 4.10 |  |  | X | X |  |  | This study |
| 120 | 1         | CP | CP V1102 | [Val-Ahp-H <sub>2</sub> O-CO+H] <sup>+</sup> | [Val-Ahp-H <sub>2</sub> O+H] <sup>+</sup> | [M+H-H <sub>2</sub> O] <sup>+</sup> | 1085.5223 | -0.09 | C <sub>52</sub> H <sub>78</sub> O <sub>16</sub> N <sub>8</sub> S | 4.12 |  |  |   | X |  |  | This study |
| 121 | 1         | CP | CP P1044 | [Phe-Ahp-H <sub>2</sub> O-CO+H] <sup>+</sup> | [Phe-Ahp-H <sub>2</sub> O+H] <sup>+</sup> | [M+H-H <sub>2</sub> O] <sup>+</sup> | 1027.4806 | 0.10  | C <sub>49</sub> H <sub>72</sub> O <sub>15</sub> N <sub>8</sub> S | 4.21 |  |  | X |   |  |  | This study |
| 122 | Ind. Node | CP | CP L1015 | [Lxx-Ahp-H <sub>2</sub> O-CO+H] <sup>+</sup> | [Lxx-Ahp-H <sub>2</sub> O+H] <sup>+</sup> | [M+H-H <sub>2</sub> O] <sup>+</sup> | 998.5234  | 0.10  | C <sub>53</sub> H <sub>73</sub> O <sub>13</sub> N <sub>7</sub>   | 4.22 |  |  | X |   |  |  | This study |
| 123 | 2         | CP | CP P1129 | [Phe-Ahp-H <sub>2</sub> O-CO+H] <sup>+</sup> | [Phe-Ahp-H <sub>2</sub> O+H] <sup>+</sup> | [M+H-H <sub>2</sub> O] <sup>+</sup> | 1112.4644 | -0.09 | C <sub>56</sub> H <sub>71</sub> O <sub>16</sub> N <sub>7</sub> S | 4.26 |  |  | X |   |  |  | This study |

|     |           |    |          |                                              |                                           |                                     |           |       |                                                                  |      |  |   |   |   |   |  |            |
|-----|-----------|----|----------|----------------------------------------------|-------------------------------------------|-------------------------------------|-----------|-------|------------------------------------------------------------------|------|--|---|---|---|---|--|------------|
| 124 | 2         | CP | CP P1147 | [Phe-Ahp-H <sub>2</sub> O-CO+H] <sup>+</sup> | [Phe-Ahp-H <sub>2</sub> O+H] <sup>+</sup> | [M+H-H <sub>2</sub> O] <sup>+</sup> | 1130.4752 | 0.09  | C <sub>56</sub> H <sub>73</sub> O <sub>17</sub> N <sub>7</sub> S | 4.28 |  |   | X |   |   |  | This study |
| 125 | 1         | CP | CP P1078 | [Phe-Ahp-H <sub>2</sub> O-CO+H] <sup>+</sup> | [Phe-Ahp-H <sub>2</sub> O+H] <sup>+</sup> | [M+H-H <sub>2</sub> O] <sup>+</sup> | 1061.4647 | -0.09 | C <sub>52</sub> H <sub>70</sub> O <sub>15</sub> N <sub>8</sub> S | 4.41 |  |   | X |   |   |  | This study |
| 126 | 2         | CP | CP P1143 | [Phe-Ahp-H <sub>2</sub> O-CO+H] <sup>+</sup> | [Phe-Ahp-H <sub>2</sub> O+H] <sup>+</sup> | [M+H-H <sub>2</sub> O] <sup>+</sup> | 1126.4445 | 0.62  | C <sub>56</sub> H <sub>69</sub> O <sub>17</sub> N <sub>7</sub> S | 4.52 |  |   |   | X |   |  | This study |
| 127 | 1         | CP | CP P1058 | [Phe-Ahp-H <sub>2</sub> O-CO+H] <sup>+</sup> | [Phe-Ahp-H <sub>2</sub> O+H] <sup>+</sup> | [M+H-H <sub>2</sub> O] <sup>+</sup> | 1041.4966 | 0.48  | C <sub>50</sub> H <sub>74</sub> O <sub>15</sub> N <sub>8</sub> S | 4.58 |  |   | X |   |   |  | This study |
| 128 | 2         | CP | CP P985  | [Phe-Ahp-H <sub>2</sub> O-CO+H] <sup>+</sup> | [Phe-Ahp-H <sub>2</sub> O+H] <sup>+</sup> | [M+H-H <sub>2</sub> O] <sup>+</sup> | 968.5142  | 0.10  | C <sub>53</sub> H <sub>67</sub> O <sub>8</sub> N <sub>11</sub>   | 4.61 |  |   | X |   |   |  | This study |
| 129 | 1         | CP | CP P1092 | [Phe-Ahp-H <sub>2</sub> O-CO+H] <sup>+</sup> | [Phe-Ahp-H <sub>2</sub> O+H] <sup>+</sup> | [M+H-H <sub>2</sub> O] <sup>+</sup> | 1075.4810 | 0.46  | C <sub>53</sub> H <sub>72</sub> O <sub>15</sub> N <sub>8</sub> S | 4.70 |  |   | X | X |   |  | This study |
| 130 | 6         | AP | AP 748   | Lys                                          | Hty                                       | [M+H] <sup>+</sup>                  | 749.4190  | -0.27 | C <sub>35</sub> H <sub>56</sub> O <sub>10</sub> N <sub>8</sub>   | 2.26 |  |   |   |   | X |  | This study |
| 131 | 6         | AP | AP 824   | Lys                                          | Phe                                       | [M+H] <sup>+</sup>                  | 825.4504  | -0.12 | C <sub>41</sub> H <sub>60</sub> O <sub>10</sub> N <sub>8</sub>   | 2.41 |  |   |   |   | X |  | This study |
| 132 | 5         | AP | AP 852   | Lys                                          | Arg                                       | [M+H] <sup>+</sup>                  | 853.4565  | -0.12 | C <sub>41</sub> H <sub>60</sub> O <sub>10</sub> N <sub>10</sub>  | 2.45 |  |   |   |   | X |  | This study |
| 133 | 5         | AP | AP 868A  | Lys                                          | Arg                                       | [M+H] <sup>+</sup>                  | 869.4879  | -0.12 | C <sub>42</sub> H <sub>64</sub> O <sub>10</sub> N <sub>10</sub>  | 2.48 |  |   | X |   |   |  | This study |
| 134 | N/A       | AP | AP 868B  | Lys                                          | Arg                                       | [M+H] <sup>+</sup>                  | 869.3676  | 0.12  | C <sub>40</sub> H <sub>53</sub> O <sub>14</sub> N <sub>8</sub>   | 2.51 |  |   | X |   |   |  | This study |
| 135 | 5         | AP | AP 866   | Lys                                          | Arg                                       | [M+H] <sup>+</sup>                  | 867.4926  | 0.35  | C <sub>42</sub> H <sub>62</sub> O <sub>10</sub> N <sub>10</sub>  | 2.52 |  |   | X | X |   |  | This study |
| 136 | 6         | AP | AP 652   | Lys                                          | Phe                                       | [M+H] <sup>+</sup>                  | 653.3658  | 0.15  | C <sub>34</sub> H <sub>49</sub> O <sub>7</sub> N <sub>6</sub>    | 2.53 |  |   |   |   | X |  | This study |
| 137 | Ind. Node | AP | AP 780   | Lys                                          | Phe                                       | [M+H] <sup>+</sup>                  | 781.4244  | 0.13  | C <sub>39</sub> H <sub>56</sub> O <sub>9</sub> N <sub>8</sub>    | 2.59 |  |   |   |   | X |  | This study |
| 138 | 6         | AP | AP 794   | Lys                                          | Phe                                       | [M+H] <sup>+</sup>                  | 795.4401  | 0.13  | C <sub>40</sub> H <sub>58</sub> O <sub>9</sub> N <sub>8</sub>    | 2.59 |  |   |   |   | X |  | This study |
| 139 | 5         | AP | AP 822A  | Lys                                          | Arg                                       | [M+H] <sup>+</sup>                  | 823.4449  | 0.12  | C <sub>39</sub> H <sub>62</sub> O <sub>13</sub> N <sub>6</sub>   | 2.61 |  |   |   |   | X |  | This study |
| 140 | 6         | AP | AP 826   | Lys                                          | Phe                                       | [M+H] <sup>+</sup>                  | 827.4122  | -0.48 | C <sub>48</sub> H <sub>54</sub> O <sub>7</sub> N <sub>6</sub>    | 2.64 |  |   |   |   | X |  | This study |
| 141 | 6         | AP | AP 822B  | Lys                                          | Phe                                       | [M+H] <sup>+</sup>                  | 823.4715  | 0.36  | C <sub>42</sub> H <sub>63</sub> O <sub>9</sub> N <sub>8</sub>    | 2.68 |  | X | X | X | X |  | This study |
| 142 | 6         | AP | AP 788   | Lys                                          | Hty                                       | [M+H] <sup>+</sup>                  | 789.4870  | 0.13  | C <sub>39</sub> H <sub>64</sub> O <sub>9</sub> N <sub>8</sub>    | 2.69 |  |   |   | X |   |  | This study |
| 143 | 6         | AP | AP 808   | Lys                                          | Phe                                       | [M+H] <sup>+</sup>                  | 809.4553  | -0.37 | C <sub>41</sub> H <sub>60</sub> O <sub>9</sub> N <sub>8</sub>    | 2.69 |  | X | X | X | X |  | This study |

|     |           |    |         |     |     |                    |          |       |                                                                 |      |   |   |   |   |   |   |                       |
|-----|-----------|----|---------|-----|-----|--------------------|----------|-------|-----------------------------------------------------------------|------|---|---|---|---|---|---|-----------------------|
| 144 | 5         | AP | AP B    | Lys | Arg | [M+H] <sup>+</sup> | 837.4617 | -0.12 | C <sub>41</sub> H <sub>60</sub> N <sub>10</sub> O <sub>9</sub>  | 2.70 |   | X | X | X | X | X | Harada et al.<br>1995 |
| 145 | 6         | AP | AP 636  | Lys | Trp | [M+H] <sup>+</sup> | 637.3707 | -0.16 | C <sub>34</sub> H <sub>48</sub> O <sub>6</sub> N <sub>6</sub>   | 2.79 | X | X | X |   | X | X | This study            |
| 146 | 6         | AP | AP 802  | Lys | Trp | [M+H] <sup>+</sup> | 803.5023 | -0.25 | C <sub>40</sub> H <sub>66</sub> O <sub>9</sub> N <sub>8</sub>   | 2.84 |   |   |   | X |   |   | This study            |
| 147 | 5         | AP | AP E    | Lys | Arg | [M+H] <sup>+</sup> | 851.4771 | -0.35 | C <sub>42</sub> H <sub>62</sub> N <sub>10</sub> O <sub>9</sub>  | 2.84 |   | X | X | X | X |   | Shin et al.<br>1998   |
| 148 | 5         | AP | AP 830  | Lys | Arg | [M+H] <sup>+</sup> | 831.5090 | 0.36  | C <sub>40</sub> H <sub>66</sub> O <sub>9</sub> N <sub>10</sub>  | 2.85 |   |   | X | X |   |   | This study            |
| 149 | Ind. node | AP | AP 837  | Lys | Arg | [M+H] <sup>+</sup> | 838.4420 | 0.36  | C <sub>36</sub> H <sub>59</sub> O <sub>12</sub> N <sub>11</sub> | 2.88 |   | X |   |   |   |   | This study            |
| 150 | 6         | AP | AP 841A | Lys | Phe | [M+H] <sup>+</sup> | 842.4114 | -0.12 | C <sub>33</sub> H <sub>55</sub> O <sub>13</sub> N <sub>13</sub> | 2.91 | X |   |   |   |   |   | This study            |
| 151 | 6         | AP | AP 851  | Lys | Arg | [M+H] <sup>+</sup> | 852.4576 | 0.23  | C <sub>37</sub> H <sub>61</sub> O <sub>12</sub> N <sub>11</sub> | 2.93 |   |   |   |   | X |   | This study            |
| 152 | 6         | AP | AP 650  | Lys | Phe | [M+H] <sup>+</sup> | 651.3865 | 0.15  | C <sub>35</sub> H <sub>50</sub> O <sub>6</sub> N <sub>6</sub>   | 2.99 | X |   | X | X | X | X | This study            |
| 153 | 5         | AP | AP 864  | Lys | Arg | [M+H] <sup>+</sup> | 865.4936 | 0.58  | C <sub>43</sub> H <sub>64</sub> O <sub>9</sub> N <sub>10</sub>  | 2.99 |   |   | X | X |   |   | This study            |
| 154 | 6         | AP | AP 679  | Lys | Phe | [M+H] <sup>+</sup> | 680.3767 | 0.15  | C <sub>35</sub> H <sub>49</sub> O <sub>7</sub> N <sub>7</sub>   | 3.13 |   | X |   |   | X |   | Harms et al.<br>2016  |
| 155 | 6         | AP | AP 815  | Lys | Phe | [M+H] <sup>+</sup> | 816.3926 | -0.12 | C <sub>42</sub> H <sub>53</sub> O <sub>10</sub> N <sub>7</sub>  | 3.14 |   |   |   |   | X |   | This study            |
| 156 | 6         | AP | AP 792  | Lys | Phe | [M+H] <sup>+</sup> | 793.4603 | -0.38 | C <sub>41</sub> H <sub>60</sub> O <sub>8</sub> N <sub>8</sub>   | 3.16 |   |   |   |   | X |   | This study            |
| 157 | 6         | AP | AP 849  | Lys | Phe | [M+H] <sup>+</sup> | 850.4708 | -0.12 | C <sub>44</sub> H <sub>63</sub> O <sub>10</sub> N <sub>7</sub>  | 3.16 |   |   |   |   | X |   | This study            |
| 158 | 6         | AP | AP 859  | Lys | Phe | [M+H] <sup>+</sup> | 860.4193 | 0.46  | C <sub>44</sub> H <sub>57</sub> O <sub>11</sub> N <sub>7</sub>  | 3.16 |   |   |   |   | X |   | This study            |
| 159 | 6         | AP | AP 736  | Lys | Phe | [M+H] <sup>+</sup> | 737.3870 | 0.14  | C <sub>38</sub> H <sub>52</sub> O <sub>9</sub> N <sub>6</sub>   | 3.25 |   | X |   |   | X | X | This study            |
| 160 | 6         | AP | AP 678  | Lys | Phe | [M+H] <sup>+</sup> | 679.3813 | -0.15 | C <sub>36</sub> H <sub>50</sub> O <sub>7</sub> N <sub>6</sub>   | 3.28 |   |   |   |   | X |   | This study            |
| 161 | 6         | AP | AP 873  | Lys | Trp | [M+H] <sup>+</sup> | 874.3982 | 0.11  | C <sub>44</sub> H <sub>55</sub> O <sub>12</sub> N <sub>7</sub>  | 3.29 |   |   |   |   | X |   | This study            |
| 162 | 6         | AP | AP 693  | Lys | Phe | [M+H] <sup>+</sup> | 694.3922 | -0.14 | C <sub>36</sub> H <sub>51</sub> O <sub>7</sub> N <sub>7</sub>   | 3.30 |   |   |   |   | X |   | This study            |
| 163 | 6         | AP | AP 829  | Lys | Phe | [M+H] <sup>+</sup> | 830.4084 | 0.12  | C <sub>43</sub> H <sub>55</sub> O <sub>10</sub> N <sub>7</sub>  | 3.30 |   |   |   |   | X |   | This study            |
| 164 | 5         | AP | AP 834  | Lys | Arg | [M+H] <sup>+</sup> | 835.4821 | -0.48 | C <sub>42</sub> H <sub>62</sub> O <sub>8</sub> N <sub>10</sub>  | 3.34 |   |   | X | X |   |   | This study            |
| 165 | 6         | AP | AP 861  | Lys | Phe | [M+H] <sup>+</sup> | 862.3782 | -0.23 | C <sub>47</sub> H <sub>47</sub> O <sub>6</sub> N <sub>11</sub>  | 3.38 |   |   |   |   | X |   | This study            |
| 166 | 6         | AP | AP 882A | Lys | Phe | [M+H] <sup>+</sup> | 883.4351 | 0.23  | C <sub>46</sub> H <sub>58</sub> O <sub>10</sub> N <sub>8</sub>  | 3.40 |   |   |   |   |   | X | McDonald<br>2023      |
| 167 | 6         | AP | AP A    | Lys | Phe | [M+H] <sup>+</sup> | 844.4238 | -0.24 | C <sub>44</sub> H <sub>57</sub> N <sub>7</sub> O <sub>10</sub>  | 3.40 | X | X |   |   | X | X | Harada et al.<br>1995 |
| 168 | 6         | AP | AP 750  | Lys | Phe | [M+H] <sup>+</sup> | 751.4026 | 0.13  | C <sub>39</sub> H <sub>54</sub> O <sub>9</sub> N <sub>6</sub>   | 3.55 |   |   | X | X |   |   | This study            |
| 169 | 6         | AP | AP 855  | Lys | Phe | [M+H] <sup>+</sup> | 856.4236 | -0.47 | C <sub>45</sub> H <sub>57</sub> O <sub>10</sub> N <sub>7</sub>  | 3.59 |   |   |   |   | X |   | This study            |

|     |           |    |         |     |                                        |                    |          |       |                                                                 |      |   |   |   |   |   |   |                          |
|-----|-----------|----|---------|-----|----------------------------------------|--------------------|----------|-------|-----------------------------------------------------------------|------|---|---|---|---|---|---|--------------------------|
| 170 | 6         | AP | AP 857  | Lys | Trp                                    | [M+H] <sup>+</sup> | 858.4392 | -0.47 | C <sub>45</sub> H <sub>59</sub> N <sub>7</sub> O <sub>10</sub>  | 3.59 | X |   |   |   | X |   | McDonald 2023            |
| 171 | 6         | AP | AP 875  | Lys | Trp                                    | [M+H] <sup>+</sup> | 876.3860 | 0.11  | C <sub>36</sub> H <sub>53</sub> O <sub>13</sub> N <sub>13</sub> | 3.59 |   |   |   |   | X |   | This study               |
| 172 | 6         | AP | AP 898  | Lys | Phe                                    | [M+H] <sup>+</sup> | 899.4274 | 0.33  | C <sub>42</sub> H <sub>54</sub> O <sub>9</sub> N <sub>14</sub>  | 3.66 |   |   |   |   |   | X | This study               |
| 173 | 6         | AP | AP 836  | Lys | Arg-CO                                 | [M+H] <sup>+</sup> | 837.3817 | -0.12 | C <sub>45</sub> H <sub>52</sub> O <sub>10</sub> N <sub>6</sub>  | 3.71 |   |   |   |   | X |   | This study               |
| 174 | 6         | AP | AP 858  | Lys | Trp                                    | [M+H] <sup>+</sup> | 859.3761 | 0.11  | C <sub>44</sub> H <sub>49</sub> O <sub>8</sub> N <sub>11</sub>  | 3.76 |   |   |   |   | X |   | This study               |
| 175 | N/A       | AP | AP 882B | Lys | Trp                                    | [M+H] <sup>+</sup> | 883.4352 | 0.34  | C <sub>46</sub> H <sub>58</sub> N <sub>8</sub> O <sub>10</sub>  | 3.79 |   |   |   |   |   | X | This study               |
| 176 | 6         | AP | AP 872  | Lys | 2-amino-5-hydroxy-phenylpentanoic acid | [M+H] <sup>+</sup> | 872.4547 | -0.57 | C <sub>46</sub> H <sub>61</sub> N <sub>7</sub> O <sub>10</sub>  | 3.84 | X |   |   |   |   |   | Isaacs 2011              |
| 177 | N/A       | AP | AP 825A | Lys |                                        | [M+H] <sup>+</sup> | 826.4167 | 0.12  | C <sub>33</sub> H <sub>56</sub> O <sub>12</sub> N <sub>13</sub> | 3.87 | X |   |   |   |   |   | This study               |
| 178 | 6         | AP | AP J    | Lys | Phe                                    | [M+H] <sup>+</sup> | 794.4445 | -0.25 | C <sub>41</sub> H <sub>59</sub> N <sub>7</sub> O <sub>9</sub>   | 3.98 | X | X |   |   | X |   | Murakami et al. 1997     |
| 179 | 6         | AP | AP D    | Lys | Phe                                    | [M+H] <sup>+</sup> | 828.4290 | -0.12 | C <sub>44</sub> H <sub>57</sub> N <sub>7</sub> O <sub>9</sub>   | 4.13 | X |   |   |   | X | X | Mazur-Marzec et al. 2016 |
| 180 | 6         | AP | FA A    | Lys | Trp                                    | [M+H] <sup>+</sup> | 867.4398 | -0.11 | C <sub>46</sub> H <sub>58</sub> N <sub>8</sub> O <sub>9</sub>   | 4.13 |   |   |   |   |   | X | Williams et al. 1996     |
| 181 | 6         | AP | AP 885  | Lys | 2-amino-5-hydroxy-phenylpentanoic acid | [M+H] <sup>+</sup> | 886.4708 | -0.11 | C <sub>47</sub> H <sub>63</sub> N <sub>7</sub> O <sub>10</sub>  | 4.22 | X |   |   |   |   |   | McCann 2022              |
| 182 | 6         | AP | FA B    | Lys | Trp                                    | [M+H] <sup>+</sup> | 881.4557 | 0.11  | C <sub>47</sub> H <sub>60</sub> N <sub>8</sub> O <sub>9</sub>   | 4.43 |   |   |   |   |   | X | Williams et al. 1996     |
| 183 | 6         | AP | AP 807  | Lys | Phe                                    | [M+H] <sup>+</sup> | 808.4603 | -0.12 | C <sub>42</sub> H <sub>61</sub> O <sub>9</sub> N <sub>7</sub>   | 4.56 | X |   |   |   |   |   | This study               |
| 184 | 6         | AP | AP 841B | Lys | Phe                                    | [M+H] <sup>+</sup> | 842.4449 | 0.24  | C <sub>45</sub> H <sub>59</sub> O <sub>9</sub> N <sub>7</sub>   | 4.60 | X |   |   |   |   |   | This study               |
| 185 | 6         | AP | AP 856  | Lys | 2-amino-5-phenylpentanoic acid         | [M+H] <sup>+</sup> | 856.4604 | 0.12  | C <sub>46</sub> H <sub>61</sub> O <sub>9</sub> N <sub>7</sub>   | 5.03 | X |   |   |   |   |   | Isaacs 2011              |
| 186 | Ind. Node | AP | AP 867  | Lys | Phe                                    | [M+H] <sup>+</sup> | 868.3694 | -0.23 | C <sub>37</sub> H <sub>49</sub> O <sub>12</sub> N <sub>13</sub> | 5.14 |   |   | X | X |   |   | This study               |



|     |           |    |         |     |     |                      |          |       |                                                                   |      |   |   |  |  |   |   |                  |
|-----|-----------|----|---------|-----|-----|----------------------|----------|-------|-------------------------------------------------------------------|------|---|---|--|--|---|---|------------------|
| 187 | 6         | AP | AP 850  | Lys | Trp | [M+H] <sup>+</sup>   | 851.4445 | -0.59 | C <sub>46</sub> H <sub>58</sub> N <sub>8</sub> O <sub>8</sub>     | 5.17 |   |   |  |  |   | X | McDonald<br>2023 |
| 188 | 6         | AP | AP 869  | Lys | Phe | [M+H] <sup>+</sup>   | 870.4758 | -0.23 | C <sub>47</sub> H <sub>63</sub> O <sub>9</sub> N <sub>7</sub>     | 5.25 | X |   |  |  |   |   | This study       |
| 189 | 6         | AP | AP 825B | Lys | Phe | [M+H] <sup>+</sup>   | 826.4168 | 0.24  | C <sub>33</sub> H <sub>55</sub> O <sub>12</sub> N <sub>13</sub>   | 5.45 | X |   |  |  |   |   | This study       |
| 190 | N/A       | AP | AP 839  | Lys | Phe | [M+H] <sup>+</sup>   | 840.4652 | -0.24 | C <sub>46</sub> H <sub>61</sub> O <sub>8</sub> N <sub>7</sub>     | 5.59 | X |   |  |  |   |   | This study       |
| 191 | 10        | MV | MV 1653 | Trp | Tyr | [M+2H] <sup>2+</sup> | 827.8459 | 0.24  | C <sub>81</sub> H <sub>94</sub> O <sub>21</sub> N <sub>18</sub>   | 2.56 |   | X |  |  |   | X | This study       |
| 192 | 10        | MV | MV 1637 | Trp | Tyr | [M+2H] <sup>2+</sup> | 819.8481 | -0.12 | C <sub>81</sub> H <sub>93</sub> O <sub>20</sub> N <sub>18</sub>   | 2.64 |   | X |  |  |   | X | This study       |
| 193 | 10        | MV | MV 1685 | Trp | Tyr | [M+2H] <sup>2+</sup> | 843.8583 | -0.24 | C <sub>95</sub> H <sub>89</sub> O <sub>11</sub> N <sub>20</sub>   | 2.67 |   | X |  |  |   | X | This study       |
| 194 | 10        | MV | MV 1871 | Trp | Tyr | [M+2H] <sup>2+</sup> | 936.8992 | -0.11 | C <sub>80</sub> H <sub>117</sub> O <sub>34</sub> N <sub>18</sub>  | 2.75 |   | X |  |  |   |   | This study       |
| 195 | N/A       | MV | MV 1619 | Trp | Tyr | [M+2H] <sup>2+</sup> | 810.8415 | -0.12 | C <sub>77</sub> H <sub>87</sub> O <sub>17</sub> N <sub>24</sub>   | 2.77 |   | X |  |  |   |   | This study       |
| 196 | 10        | MV | MV 1901 | Trp | Tyr | [M+2H] <sup>2+</sup> | 951.9023 | -0.11 | C <sub>77</sub> H <sub>113</sub> O <sub>33</sub> N <sub>24</sub>  | 2.78 |   | X |  |  |   | X | This study       |
| 197 | 10        | MV | MV 1699 | Trp | Tyr | [M+2H] <sup>2+</sup> | 850.8668 | -0.12 | C <sub>70</sub> H <sub>107</sub> O <sub>33</sub> N <sub>16</sub>  | 2.81 | X |   |  |  |   | X | This study       |
| 198 | 10        | MV | MV 1853 | Trp | Tyr | [M+2H] <sup>2+</sup> | 927.8921 | -0.10 | C <sub>105</sub> H <sub>101</sub> O <sub>15</sub> N <sub>18</sub> | 2.83 |   | X |  |  |   |   | This study       |
| 199 | 10        | MV | MV 1669 | Trp | Tyr | [M+2H] <sup>2+</sup> | 835.8614 | 0.12  | C <sub>82</sub> H <sub>97</sub> O <sub>21</sub> N <sub>18</sub>   | 2.84 |   | X |  |  |   | X | This study       |
| 200 | 10        | MV | MV 1933 | Trp | Tyr | [M+2H] <sup>2+</sup> | 967.9169 | 0.10  | C <sub>95</sub> H <sub>113</sub> O <sub>25</sub> N <sub>20</sub>  | 2.87 |   |   |  |  |   | X | This study       |
| 201 | 10        | MV | MV 1903 | Trp | Tyr | [M+2H] <sup>2+</sup> | 952.9110 | 0.42  | C <sub>94</sub> H <sub>111</sub> O <sub>24</sub> N <sub>20</sub>  | 2.88 |   | X |  |  |   | X | This study       |
| 202 | 9         | MV | MV 1521 | Trp | Tyr | [M+2H] <sup>2+</sup> | 761.8185 | -0.53 | C <sub>77</sub> H <sub>85</sub> O <sub>18</sub> N <sub>16</sub>   | 2.89 |   | X |  |  |   |   | This study       |
| 203 | 7         | MV | MV 1529 | Trp | Phe | [M+2H] <sup>2+</sup> | 765.8366 | -0.52 | C <sub>74</sub> H <sub>93</sub> O <sub>22</sub> N <sub>14</sub>   | 2.92 | X |   |  |  | X |   | This study       |
| 204 | 10        | MV | MV 1885 | Trp | Phe | [M+2H] <sup>2+</sup> | 943.9064 | 0.21  | C <sub>94</sub> H <sub>109</sub> O <sub>23</sub> N <sub>20</sub>  | 2.93 |   | X |  |  |   |   | This study       |
| 205 | N/A       | MV | MV 1754 | Trp | Tyr | [M+2H] <sup>2+</sup> | 878.3882 | -0.23 | C <sub>87</sub> H <sub>100</sub> O <sub>18</sub> N <sub>23</sub>  | 2.94 |   | X |  |  |   | X | This study       |
| 206 | 10        | MV | MV 1683 | Trp | Tyr | [M+2H] <sup>2+</sup> | 842.8682 | 0.24  | C <sub>76</sub> H <sub>104</sub> N <sub>18</sub> O <sub>26</sub>  | 2.96 |   | X |  |  |   | X | This study       |
| 207 | 9         | MV | MV 1553 | Trp | Tyr | [M+2H] <sup>2+</sup> | 777.8319 | -0.13 | C <sub>78</sub> H <sub>89</sub> O <sub>19</sub> N <sub>16</sub>   | 2.97 |   | X |  |  |   | X | This study       |
| 208 | Ind. Node | MV | MV 1526 | Trp | Tyr | [M+2H] <sup>2+</sup> | 764.3364 | -0.13 | C <sub>71</sub> H <sub>84</sub> O <sub>15</sub> N <sub>25</sub>   | 3    | X |   |  |  | X |   | This study       |
| 209 | 9         | MV | MV 1523 | Trp | Tyr | [M+2H] <sup>2+</sup> | 762.8270 | -0.07 | C <sub>77</sub> H <sub>89</sub> O <sub>18</sub> N <sub>16</sub>   | 3.01 |   |   |  |  |   | X | This study       |
| 210 | N/A       | MV | MV 1544 | Trp | Tyr | [M+2H] <sup>2+</sup> | 773.3392 | -0.39 | C <sub>81</sub> H <sub>90</sub> O <sub>17</sub> N <sub>15</sub>   | 3.08 |   |   |  |  | X |   | This study       |
| 211 | N/A       | MV | MV 1749 | Trp | Lys | [M+2H] <sup>2+</sup> | 875.8772 | -0.23 | C <sub>80</sub> H <sub>105</sub> O <sub>27</sub> N <sub>18</sub>  | 3.22 |   |   |  |  | X |   | This study       |
| 212 | 9         | MV | MV 1505 | Trp | Tyr | [M+2H] <sup>2+</sup> | 753.8214 | -0.13 | C <sub>77</sub> H <sub>85</sub> O <sub>17</sub> N <sub>16</sub>   | 3.23 |   | X |  |  |   |   | This study       |
| 213 | 9         | MV | MV 1537 | Trp | Tyr | [M+2H] <sup>2+</sup> | 769.8345 | -0.13 | C <sub>78</sub> H <sub>89</sub> O <sub>18</sub> N <sub>16</sub>   | 3.28 |   | X |  |  |   | X | This study       |
| 214 | N/A       | MV | MV 1494 | Trp | Lys | [M+2H] <sup>2+</sup> | 748.3354 | -0.27 | C <sub>72</sub> H <sub>86</sub> O <sub>14</sub> N <sub>23</sub>   | 3.3  |   | X |  |  |   |   | This study       |
| 215 | 7         | MV | MV 1731 | Trp | Phe | [M+2H] <sup>2+</sup> | 866.8727 | -0.11 | C <sub>81</sub> H <sub>99</sub> O <sub>22</sub> N <sub>22</sub>   | 3.37 | X |   |  |  | X |   | This study       |
| 216 | Ind. Node | MV | MV 1733 | Trp | Phe | [M+2H] <sup>2+</sup> | 867.8798 | -0.12 | C <sub>80</sub> H <sub>105</sub> O <sub>26</sub> N <sub>18</sub>  | 3.53 | X |   |  |  | X |   | This study       |
| 217 | 8         | MV | MV 1747 | Trp | Tyr | [M+2H] <sup>2+</sup> | 874.8876 | -0.11 | C <sub>81</sub> H <sub>107</sub> O <sub>26</sub> N <sub>18</sub>  | 3.75 | X |   |  |  | X |   | This study       |

|     |     |    |         |     |     |                      |          |       |                                                                  |      |   |  |  |  |   |   |            |
|-----|-----|----|---------|-----|-----|----------------------|----------|-------|------------------------------------------------------------------|------|---|--|--|--|---|---|------------|
| 218 | N/A | MV | MV 1753 | Trp | Lys | [M+2H] <sup>2+</sup> | 877.8491 | 0.11  | C <sub>88</sub> H <sub>89</sub> O <sub>17</sub> N <sub>24</sub>  | 3.75 | X |  |  |  | X |   | This study |
| 219 | N/A | MV | MV 1730 | Trp | Lys | [M+2H] <sup>2+</sup> | 866.3926 | -0.12 | C <sub>82</sub> H <sub>108</sub> O <sub>25</sub> N <sub>17</sub> | 3.76 |   |  |  |  |   | X | This study |
| 220 | 8   | MV | MV 1765 | Trp | Lys | [M+2H] <sup>2+</sup> | 883.8928 | -0.23 | C <sub>81</sub> H <sub>111</sub> O <sub>27</sub> N <sub>18</sub> | 3.78 | X |  |  |  | X |   | This study |
| 221 | N/A | MV | MV 1737 | Trp | Phe | [M+2H] <sup>2+</sup> | 869.8654 | -0.11 | C <sub>78</sub> H <sub>97</sub> O <sub>23</sub> N <sub>24</sub>  | 3.81 | X |  |  |  | X |   | This study |
| 222 | 7   | MV | MV 1715 | Trp | Phe | [M+2H] <sup>2+</sup> | 858.8754 | 0.12  | C <sub>81</sub> H <sub>99</sub> O <sub>21</sub> N <sub>22</sub>  | 3.97 | X |  |  |  | X |   | This study |
| 223 | 8   | MV | MV 1779 | Trp | Lys | [M+2H] <sup>2+</sup> | 890.9010 | 0.11  | C <sub>82</sub> H <sub>111</sub> O <sub>27</sub> N <sub>18</sub> | 3.95 | X |  |  |  | X |   | This study |
| 224 | N/A | MV | MV 1895 | Trp | Tyr | [M+2H] <sup>2+</sup> | 948.9013 | -0.11 | C <sub>88</sub> H <sub>113</sub> O <sub>28</sub> N <sub>20</sub> | 3.97 |   |  |  |  | X |   | This study |
| 225 | N/A | MV | MV 1785 | Trp | Lys | [M+2H] <sup>2+</sup> | 893.8629 | -0.11 | C <sub>92</sub> H <sub>101</sub> O <sub>24</sub> N <sub>14</sub> | 4.11 |   |  |  |  | X |   | This study |

Abbreviations: AG; aeruginosin, AP; anabaenopeptin, CP; cyanopeptolin, FA; ferintoic acid, Lxx; leucine or isoleucine, MC; microcystin, MV; microviridin. Ind. Node indicates the compound appeared as an individual node within the GNPS molecular network. N/A indicates the compound did not appear within the molecular network.

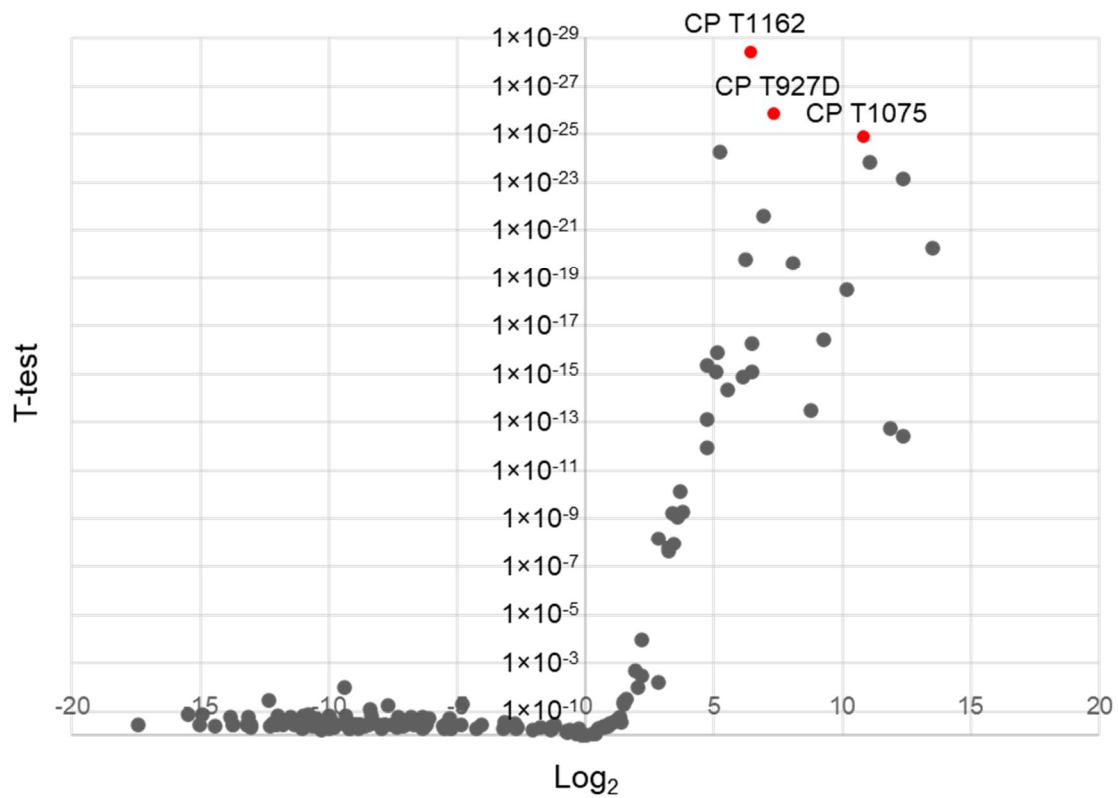

**Figure S3.** Volcano plot for *P. rubescens* CPCC 507 features.

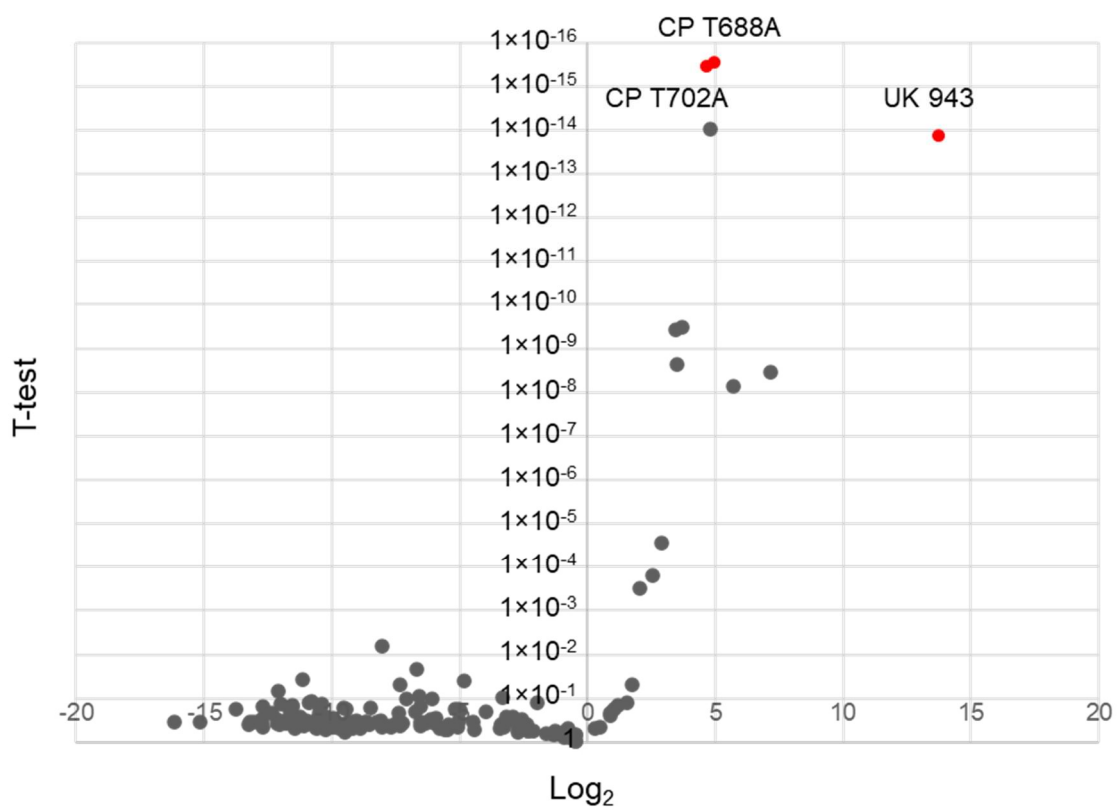

**Figure S4.** Volcano plot for *P. agardhii* CPCC 720 features.

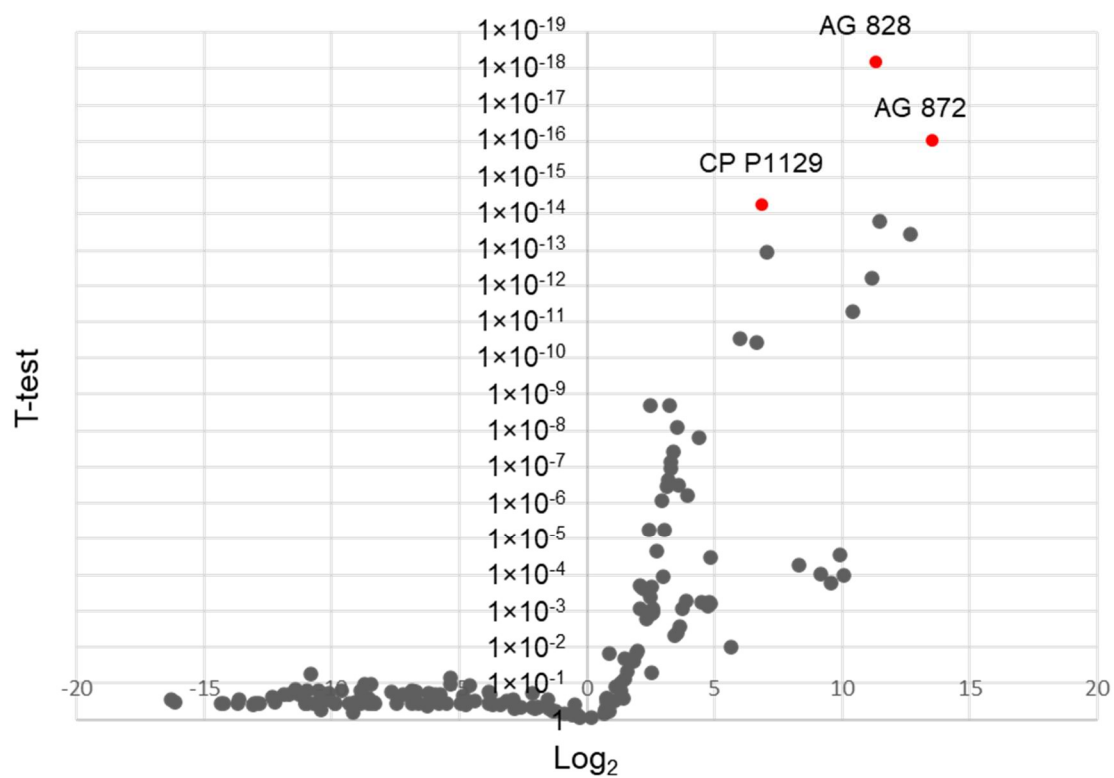

**Figure S5.** Volcano plot for *P. rubescens* CPCC 731 features.

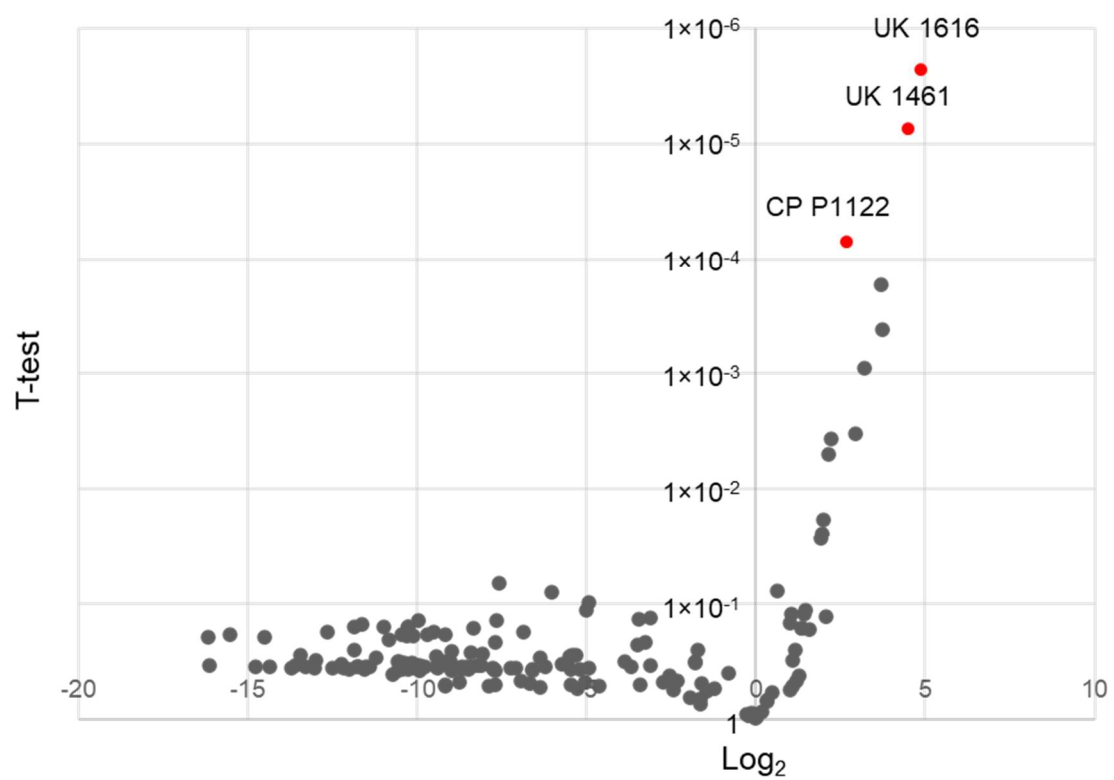

**Figure S6.** Volcano plot for *P. rubescens* CPCC 732 features.

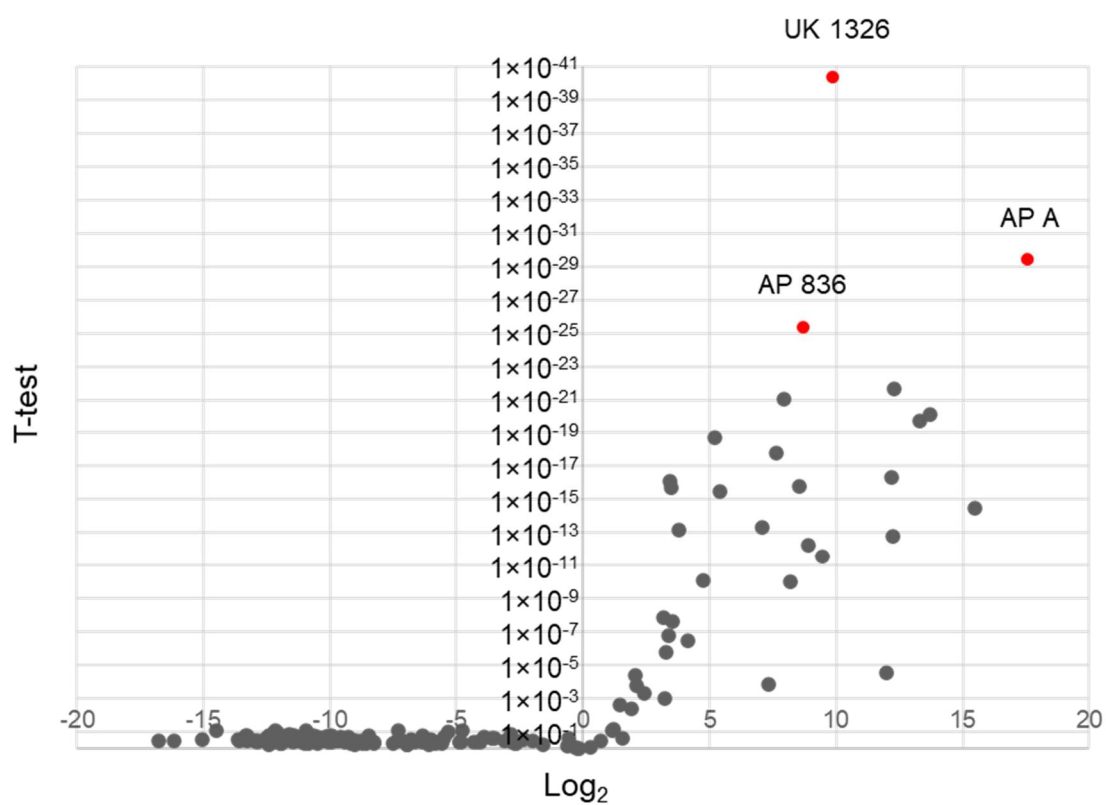

**Figure S7.** Volcano plot for *P. rubescens* CPCC 733 features.

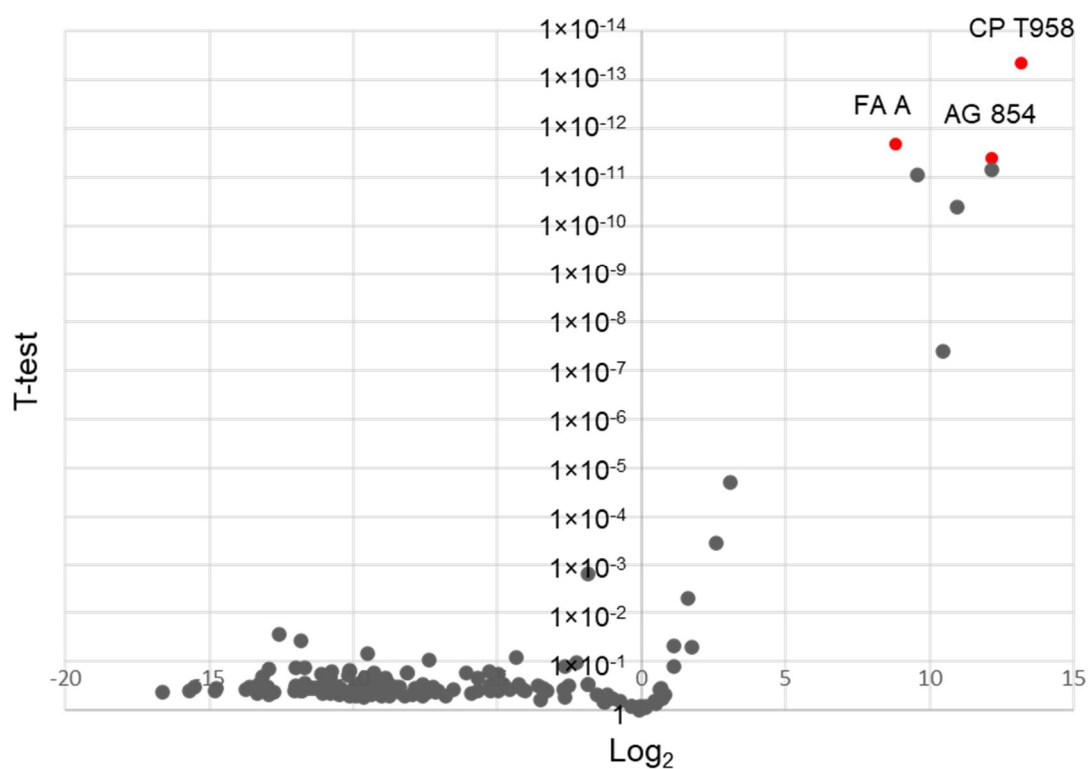

**Figure S8.** Volcano plot for *Planktothrix* sp. CPCC 735 features.

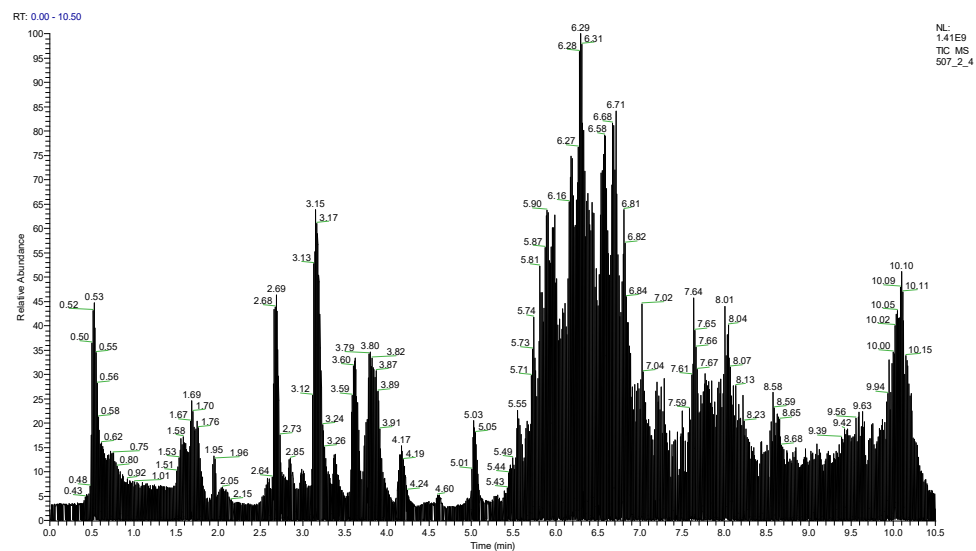

Figure S9. TIC for *P. rubescens* CPCC 507.

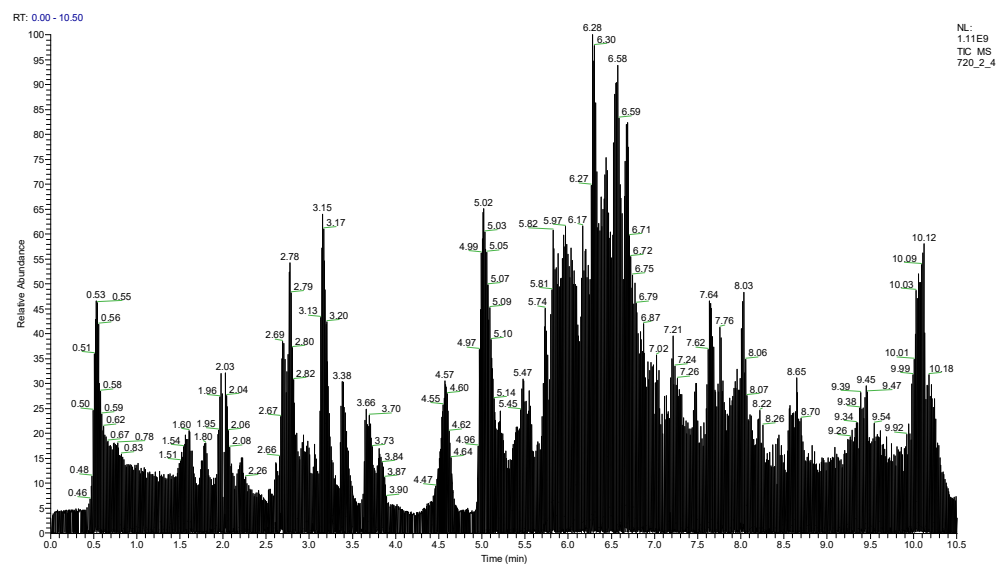

Figure S10. TIC for *P. agardhii* CPCC 720.

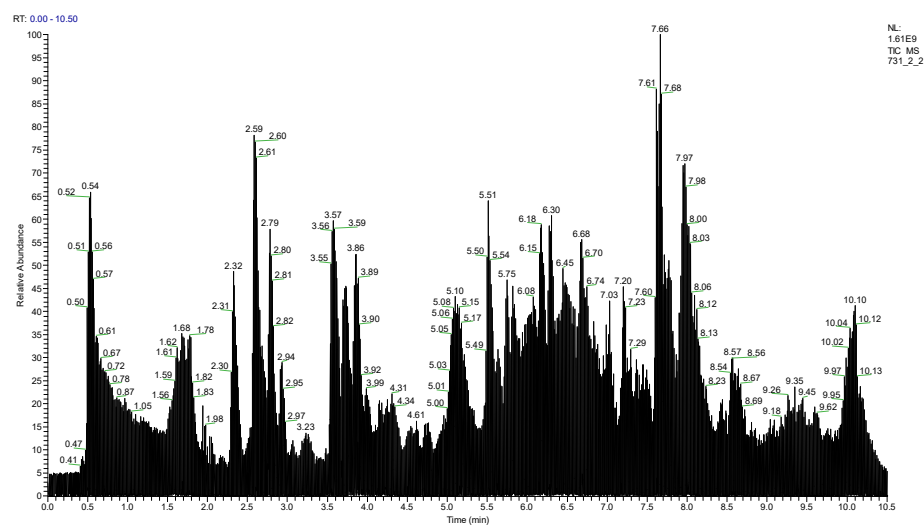

Figure S11. TIC for *P. rubescens* CPCC 731.

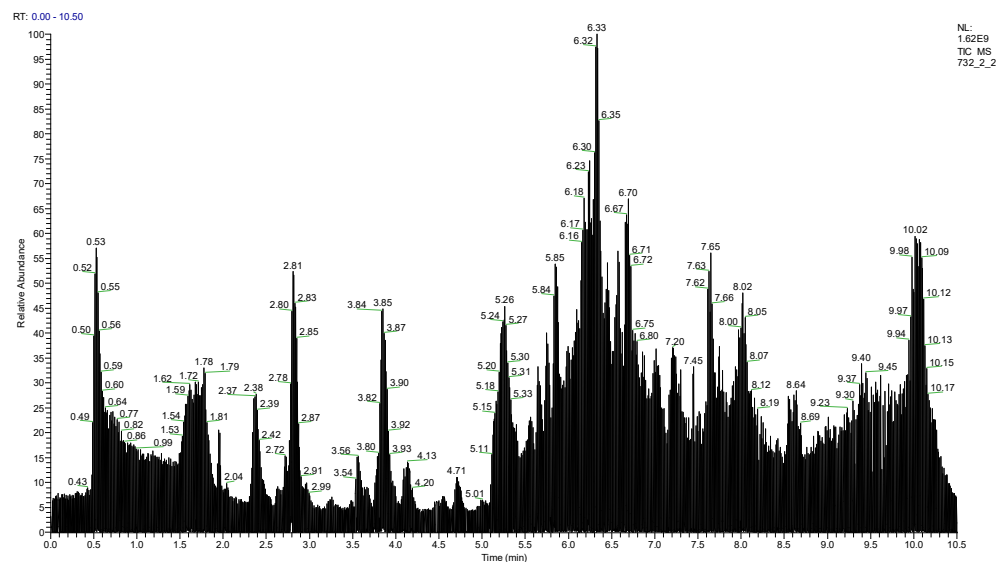

Figure S12. TIC for *P. rubescens* CPCC 732.

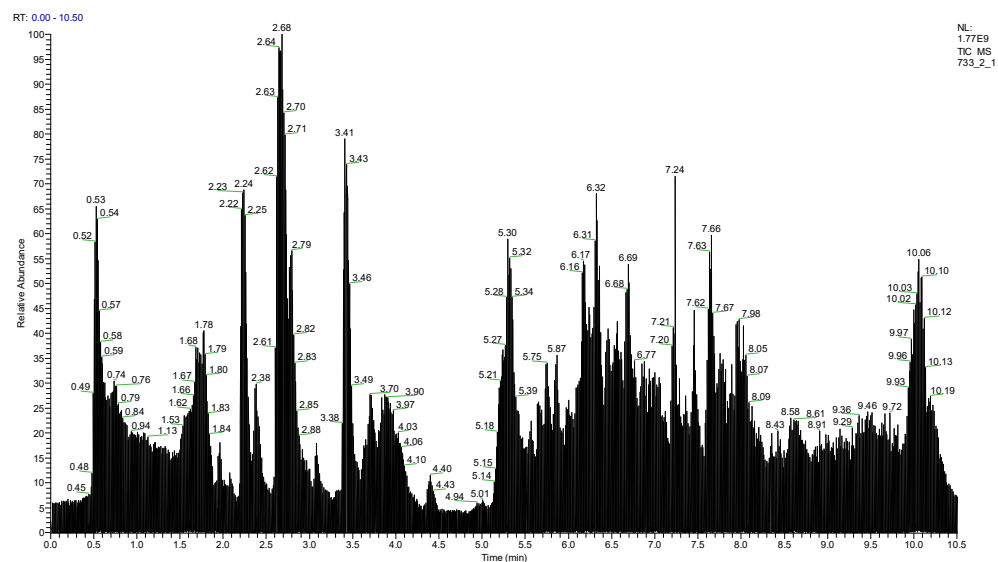

Figure S13. TIC for *P. rubescens* CPCC 733.

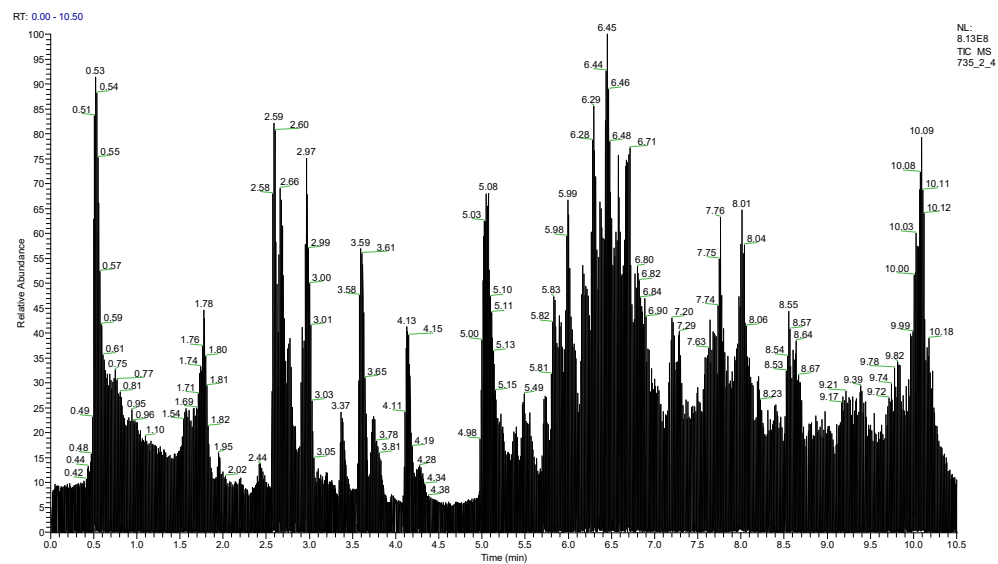

Figure S14. TIC for *Planktothrix* sp. CPCC 735.
